1

2

3

4 **Exploratory study of factors associated with human**  
5 **brucellosis in mainland China based on**  
6 **time-series-cross-section data from 2005 to 2016**

7

8

Yun Lin<sup>1</sup>, Tao Zhang<sup>1\*</sup>, Xingyu Zhang<sup>2</sup>

9

10 <sup>1</sup> Department of Epidemiology and Health Statistics, West China School of Public  
11 Health, Sichuan University, Chengdu, Sichuan, China.

12 <sup>2</sup> Applied biostatistics laboratory, University of Michigan School of Nursing, Ann  
13 Arbor, Michigan State, USA

14

15 \*Corresponding author

16 Email: [scdxzhangtao@163.com](mailto:scdxzhangtao@163.com) (TZ)

17

18

19

20

21

## 22 **Abstract**

23 Objective: Many studies focused on reasons behind the increasing incidence and the  
24 spread of human brucellosis in mainland China, yet most of them lacked  
25 comprehensive consideration with quantitative evidence. Hence, this study aimed to  
26 further investigate the epidemic mechanism and associated factors of human  
27 brucellosis in China so as to provide suggestions on more effective countermeasures.

28 Methods: Data of human brucellosis incidence and some associated factors in  
29 economy, animal husbandry, transportation and health were collected at provincial  
30 level from 2005-2016. Time series plot and cluster analysis were first used to  
31 visualize incidence levels and categorize provinces based on their incidence level and  
32 epidemic trend of human brucellosis. Furthermore, according to the characteristics of  
33 data, the dynamic panel data model in combination with supervised principal  
34 component analysis was proposed to explore the effects of associated factors on  
35 human brucellosis.

36 Results: ① The incidence rate of human brucellosis has increased threefold (from  
37 1.41 in 2005 to 4.22 in 2016) in mainland China. Incidence rates in the north have  
38 always been higher than those in the south, but the latter also experienced an upward  
39 trend especially in the recent five years. ② The 31 provinces of mainland China  
40 were categorized into three clusters, and each cluster had its own characteristics of  
41 incidence level and epidemic trend. ③ Public health expenditure and rural medical  
42 expenditure proportion were potential protective factors of human brucellosis, with

43 attribute risks of -0.74 and -1.04 respectively. Other factors (such as amount of sheep,  
44 total length of highways, etc.) exhibited relatively trivial effects.

45 Conclusions: The epidemic status of human brucellosis has changed in both spatial  
46 and temporal dimensions in recent years. Apart from those traditional control  
47 measures, more attention should be paid to the improvement of medical healthcare  
48 especially in rural areas in order to strengthen the control effect.

## 49 **Introduction**

50 Brucellosis is a highly contagious zoonotic disease mainly caused by unpasteurized  
51 milk or undercooked meat products from infected animals. Direct contacts with ill  
52 animals can also cause brucellosis infection. On a global scale, brucellosis was and  
53 still is an important zoonosis across the world [1-3]. In China [4], it has been listed as  
54 the class B notifiable infectious disease since 2005 as well as one of the most serious  
55 types of class B diseases among those listed in the *Detailed Rules for the*  
56 *Implementation of the Regulations on Livestock and Poultry Epidemic Prevention*.  
57 The incidence of human brucellosis in mainland China decreased during the  
58 1980-1990s but then rose steadily since 1995 till the 2014 peak. Apart from the  
59 temporal trend, the epidemic of human brucellosis in mainland China also had some  
60 spatial characteristics. In the past [5-6], brucellosis (both among human and animals)  
61 was most severe in the northeast area in China possibly due to [7] that the massive  
62 number of pastures increased local residents' risks of exposure to infected animals or  
63 their products. However, some recent studies [6] showed that human brucellosis

64 epidemics were spreading from traditional high-incidence areas in the north to  
65 non-pastoral areas in the south. Such a rapidly increasing and spreading epidemic  
66 trend deserved much attention. Though the government has noticed the problem and  
67 some countermeasures have already been taken (e.g. the application of brucellosis  
68 vaccine and the setup of brucellosis prevention institutes) [8-9], the situation was not  
69 optimistic yet.

70 Many studies have tried to explore reasons behind the prevalence, and there were  
71 some widely-accepted explanations [10], including the rapid development of  
72 husbandry, changes in the feeding mode of livestock, the frequent trading of livestock  
73 products among different areas, the increasing mobility of infected animals and so  
74 forth. In terms of the expansion of involved areas, some studies [11] assumed that  
75 people's increasing opportunities to contact infected animals directly or indirectly in  
76 recent years might be the reason. In the study of Jiang et al [12], it was found that the  
77 Northern and Southern brucella strains shared the same MLVA-16 genotype, which  
78 somehow verified another popular speculation that the epidemic in southern area was  
79 partly caused by the import of infected animals from other areas. Therefore, it could  
80 be summarized that the development of husbandry and trading was the most  
81 commonly accepted explanation for human brucellosis epidemics in recent years.

82 Although current studies were instructive and illuminating for the prevention and  
83 control of human brucellosis, they still had some insufficiencies. First of all, most  
84 studies chose the qualitative methods instead of quantitative ones, which unavoidably  
85 made their conclusions rather crude and of less help. Moreover, some quantitative

86 studies [13-14] have only focused on a limited geographic area or a particularly small  
87 population, which weakened their ability in providing evidence for carrying out more  
88 effective brucellosis countermeasures on a larger scale.

89 Another imperative need for human brucellosis study was to comprehensively  
90 consider the multivariate influences underlying the epidemics. The changing and not  
91 well-controlled epidemic of human brucellosis in recent years reminded us that there  
92 might be many factors interacting with each other and jointly influencing the  
93 incidence. However, some studies [6] only described the temporal and spatial  
94 characteristics of human brucellosis, but did not involve model building for further  
95 quantitative analysis (such as associated factors exploration and forecasting); some  
96 [15] built the time series model of human brucellosis incidence without penetrating its  
97 associated factors; another studies [16] considered the associated factors but limited to  
98 only a few aspects (such as environmental and animal husbandry factors). Hence,  
99 studies with comprehensive analysis of various associated factors are needed,  
100 especially considering the complex interaction among various factors. For example,  
101 suppose Cause A was the risk factor of human brucellosis, but it may be ignored in  
102 practice if there was another factor (Cause B) that offset the effect of Cause A on  
103 human brucellosis incidence. Therefore, it was necessary to consider the  
104 comprehensive effects of different causes all together in order to avoid bias and make  
105 the results of study more helpful and feasible.

106 This is a preliminary study targeted at the temporal-spatial characteristics of human  
107 brucellosis prevalence and the joint influence of different associated factors in  
108 mainland China in the last decade (2005 to 2016). We aimed to reveal the spatial and  
109 temporal characteristics of human brucellosis prevalence and explore the effects of its  
110 associated factors in a comprehensive and quantitative way, which would provide  
111 more valid evidence for making sophisticated and specific strategies for the  
112 prevention and control of human brucellosis in China and the rest of the world.

## 113 **Materials and Methods**

### 114 **Materials**

115 Incidence rates of human brucellosis of the 31 provinces in mainland China from  
116 2005 to 2016 were excerpted from China Public Health Statistical Yearbook  
117 (<http://www.nhfpc.gov.cn/zwgkzt/tjnj/list.shtml>) and the China National Knowledge  
118 Infrastructure (CNKI) website. A total of 13 associated factors were included and  
119 divided into three types: (1)Type I: the economy and animal husbandry factors (total  
120 output value of animal husbandry(*animal\_husbandry*), amount of sheep (*sheep\_num*),  
121 number of cattle (*cattle\_num*), mutton production (*mutton\_prod*), beef production  
122 (*beef\_prod*) and Gross Domestic Product (*GDP*));(2)Type II: the transportation  
123 factors (the turnover value of the whole society (*good\_transfer*) and total length of  
124 highways (*highway*));(3)Type III: the hygiene and health factors (the number of  
125 medical institutions (*institute\_num*), the number of health personnel  
126 (*health\_personnel*), public health expenditure (*health\_input*), urban medical

127 expenditure proportion (*urban\_medical\_prop*) and rural medical expenditure  
128 proportion (*rural\_medical\_prop*). The corresponding data of associated factors came  
129 from the China Statistical Yearbook (<http://www.stats.gov.cn/tjsj/ndsj/>). For better  
130 understanding, abbreviations and meanings of each included factor were listed in  
131 Table 1. Furthermore, for the convenience of analysis, comparison and interpretation,  
132 all these factors were standardized beforehand.

133 **Table 1. Explanations for all included associated factors.**

| Factor name                                                   | Abbreviation            | Meaning                                                                                                                                                                                                                   |
|---------------------------------------------------------------|-------------------------|---------------------------------------------------------------------------------------------------------------------------------------------------------------------------------------------------------------------------|
| Total output value of animal husbandry (Hundred million Yuan) | <i>animal_husbandry</i> | The total value of all products of animal husbandry represented by money and all kinds of supportive services for animal husbandry production, which can reflect the total scale of animal husbandry in a certain period. |
| Amount of sheep (Ten thousand)                                | <i>sheep_num</i>        | The amount of sheep kept by all units and urban residents at the end of the year.                                                                                                                                         |
| Number of cattle                                              | <i>cattle_num</i>       | The number of cattle kept by all units and urban residents.                                                                                                                                                               |
| Mutton production (Ten thousand tons)                         | <i>mutton_prod</i>      | The weight of mutton that was butchered in that year in the whole society.                                                                                                                                                |
| Beef production (Ten thousand tons)                           | <i>beef_prod</i>        | The weight of beef that was butchered in that year in the whole society.                                                                                                                                                  |

| Factor name                                                              | Abbreviation              | Meaning                                                                                                                                               |
|--------------------------------------------------------------------------|---------------------------|-------------------------------------------------------------------------------------------------------------------------------------------------------|
| Gross Domestic Product (Hundred million Yuan)                            | <i>GDP</i>                | The total value of all final products and services produced by all permanent units in a country (or region) over a specified period of time.          |
| turnover value of the whole society (Hundred million tons per kilometre) | <i>good_transfer</i>      | The sum of the number of goods transported by all means of transportation multiplied by the corresponding distance in the whole society.              |
| total length of highways (kilometres)                                    | <i>highway</i>            | The total length of highways in the area.                                                                                                             |
| the number of medical institutions                                       | <i>institute_num</i>      | The number of all licensed medical institutions in the area.                                                                                          |
| the number of health personnel (Ten thousand)                            | <i>health_personnel</i>   | The total number of all employees working in hospitals, primary medical-care institutions, public health institutions and other medical institutions. |
| public health expenditure (Hundred million Yuan)                         | <i>health_input</i>       | Financial allocation by governments at all levels for health undertakings.                                                                            |
| urban medical expenditure proportion (%)                                 | <i>urban_medical_prop</i> | Medical and health care expenditure of urban residents as a percentage of consumption expenditure.                                                    |



| Factor name                              | Abbreviation              | Meaning                                                                                            |
|------------------------------------------|---------------------------|----------------------------------------------------------------------------------------------------|
| rural medical expenditure proportion (%) | <i>rural_medical_prop</i> | Medical and health care expenditure of rural residents as a percentage of consumption expenditure. |

## 134 **Methods**

135 The temporal and spatial characteristics of human brucellosis epidemics from 2005  
136 to 2016 in mainland China were described at first. Afterwards, cluster analysis was  
137 used to categorize the geographic regions based on time series incidence data of each  
138 province. As for the following exploratory analysis, it should first be noted that the  
139 complicated temporal-spatial effect within our dataset had violated the necessary  
140 independence assumption for the application of traditional linear regression models,  
141 while the sample size (observations of each province) was relatively small. Hence, to  
142 tackle these two challenges, this study intended to utilize the dynamic panel data  
143 model combined with supervised principal component analysis (PCA) to quantify the  
144 effects of associated factors on human brucellosis incidence. The basic form of  
145 dynamic panel data model (without supervised PCA) was shown in Eq.(1):

$$146 \quad y_{n,t} = \beta y_{n,t-1} + \gamma x_{n,t} + \lambda_t + \mu_{n,t} \quad (n = 1, 2, \dots, N; t = 1, 2, \dots, T), \quad (1)$$

147 where  $n$  represented the province,  $t$  the year ( $n$  and  $t$  were both sequentially  
148 numbered),  $y_{n,t}$  the human brucellosis incidence rate of the  $n$ -th province in the  $t$ -th  
149 year, and  $y_{n,t-1}$  referred to that in the past year. In addition,  $x_{n,t}$  was the value of the  
150 associated factor of the  $n$ -th province in year  $t$ ,  $\lambda_t$  indicated the temporal effect of the

151 year  $t$  and  $\mu_{n,t}$  the random effect of the  $n$ -th province in the  $t$ -th year. Specifically, the  
152 regression coefficient  $\gamma$  measured the relative risk of factor  $x$  on the human brucellosis  
153 incidence, which was the parameter of interest in this study.

154 During this study, we combined the supervised PCA with the dynamic panel data  
155 model [17]. Factors of concern were first selected based on their standardized  
156 univariate regression coefficients and the corresponding threshold  $\theta$  estimated by  
157 cross-validation method. Subsequently, for each type of factors, we calculated the  
158 principal components as the linear combinations of those selected factors, where the  
159 linear combination coefficients were computed by the eigenvector-based method. For  
160 example,  $economic_1$ ,  $economic_2, \dots$ , and  $economic_R$  were used to represent the  
161 principal components of the type I factors (the economy and animal husbandry  
162 factors), where the value of  $R$  was determined by the cumulative contribution rate of  
163 the corresponding principal components. The cumulative contribution rate ranged  
164 from 0 to 100%, and the higher it was, the more eligible the principal components  
165 would be to represent those original factors. For type I factors, the cut-off point of the  
166 cumulative contribution rate was set to be 90%, which meant the  $R$  principal  
167 components of the type I factors should at least contain 90% of original information.  
168 Similarly, let  $S$  and  $M$  be the number of principal components for the type II factors  
169 (the transportation factors) and type III factors (the hygiene and health factors),  
170 respectively. The corresponding principal components can be denoted as  $transfer_1$ ,  
171  $transfer_2, \dots$ , and  $transfer_S$ , as well as  $health_1$ ,  $health_2, \dots$ , and  $health_M$ . The cut-off  
172 point of the cumulative contribution rate was set to be 90% for the type II factors, and

173 80% for the type III factors (since only two original factors were included). As a  
174 result, the specific dynamic panel data model with the supervised PCA for this study  
175 could be built as below:

$$176 \quad y_{n,t} = \beta y_{n,t-1} + \sum_{r=1}^R \omega_r \cdot economic_{n,t,r} + \sum_{s=1}^S \nu_s \cdot transfer_{n,t,s} + \sum_{m=1}^M \zeta_m \cdot health_{n,t,m} + \lambda_t + \mu_{n,t}, \quad (2)$$

$$177 \quad (n = 1, 2, \dots, N; t = 1, 2, \dots, T; r = 1, 2, \dots, R; s = 1, 2, \dots, S; m = 1, 2, \dots, M).$$

178 In Eq.(2),  $economic_{n,t,r}$  referred to the value of the  $r$  principal component in  
179 economic and husbandry of the  $n$ -th province in the  $t$ -th year, so were the definition of  
180  $transfer_{n,t,s}$  and  $health_{n,t,m}$ . In addition,  $\omega_r$ ,  $\nu_s$  and  $\zeta_m$  referred to the average  
181 value of the effect of the  $r$ -th principal component in economic and husbandry, the  
182  $s$ -th principal component in transportation and the  $m$ -th principal component in  
183 hygiene and health, respectively. Definitions of other factors were the same as those  
184 in Eq. (1).

185 Throughout this study, all analyses were done in R 3.5.0, a free software  
186 environment for statistical computing and graphics. Computing Packages  $\{plm\}$  and  
187  $\{ggplot2\}$  were downloaded from the Comprehensive R Archive Network (CRAN) at  
188 <http://cran.r-project.org/> and installed in advance.

## 189 **Results**

### 190 **Descriptions of the spatial and temporal distribution**

191 According to the time series plot of the nationwide human brucellosis incidence  
192 (Fig 1), the incidence rate increased three-fold from 1.41 per 100,000 people in 2005

193 to 4.22 per 100,000 in 2016, though it went down a little in 2015. With such an  
194 upward trend nationally, the epidemic situation also changed slightly in different  
195 regions. Though the northern incidence rate has always been higher than that in the  
196 south, which was in accordance with previous reports [18], the southern incidence  
197 also began to increase in the recent five years and such an increase even continued  
198 despite the decrease in the northern incidence since 2014. From the time series plot, it  
199 could be inferred that: ①The human brucellosis incidence rate went up significantly  
200 during the study period; ②There was an overall upward trend of the epidemic in the  
201 south area (especially in southeastern provinces) while the northern provinces still  
202 kept high records of incidence rates. This indicated that the pastoral areas were still  
203 high epidemic areas while the incidence of human brucellosis also became more  
204 intense in half pastoral areas and agricultural areas, which coincided with the  
205 conclusion of Zhang et al [19].

206 **Fig 1. The time series plot of human brucellosis incidence nationwide and in**  
207 **south/north China.**

208 As for the cluster analysis, the result indicated that these 31 provinces could be  
209 classified into three clusters according to their incidence level and epidemic trend.  
210 Specifically, Inner Mongolia alone belonged to Cluster 1; Ningxia, Xinjiang, Shanxi  
211 and Heilongjiang belonged to Cluster 2 and the remaining provinces were included in  
212 Cluster 3 (Fig 2). Through reviews of previous studies [6], a similar partition was  
213 observed, which helped to testify the rationality of our clustering.

214 **Fig 2. The clustering result of the 31 provinces.**

215 Based on the clustering results, the time series plots for the three clusters were  
216 drawn respectively in Fig 3, which indicated that provinces in the same cluster did  
217 share similar prevalence level and epidemic trend. There was only one province in  
218 Cluster 1 (Inner Mongolia), and its incidence rate has always been the highest in  
219 China with a steady increase since 2005; after peaking at 2011, the rate dropped  
220 gradually despite a rebound in 2014. Ningxia, Xinjiang, Shanxi and Heilongjiang  
221 were categorized into Cluster 2 and their incidence rates were lower than that of  
222 Cluster 1, yet higher than most provinces in Cluster 3. Among these four provinces,  
223 Ningxia and Xinjiang shared a more similar epidemic characteristics (peaking at 2015  
224 after increasing steeply since 2011) while incidence rates of Shanxi and Heilongjiang  
225 steadily remained at the level of 5-20 per 100,000 people most of the time. Cluster 3  
226 included 26 provinces such as Jilin, Tibet and Guangdong. These provinces had low  
227 incidence rates and mostly peaked in 2014-2015, but Jilin was an exception for it  
228 experienced a decrease after an obvious rise in 2009.

229 **Fig 3. The time series plots of incidence rates for: (A)Cluster 1; (B)Cluster 2;**  
230 **(C)Cluster 3.**

231 It could be seen that provinces in Cluster 2 (Shanxi, Heilongjiang, Ningxia and  
232 Xinjiang) and some provinces in Cluster 3 (Hebei, Liaoning, Shandong, Henan,  
233 Shaanxi and Gansu) all possessed a relatively high incidence rate and a similar  
234 epidemic trend, making it plausible to include them into further modelling analysis to  
235 reveal the underlying associated factors of human brucellosis. Other provinces were  
236 excluded because their extremely high or low incidence rates would perform as

237 outliers and affect the validity and stability of statistical modelling. As a result, ten  
238 provinces in total were included in the statistical modelling stage, which were Gansu,  
239 Hebei, Heilongjiang, Liaoning, Henan, Ningxia, Shandong, Shanxi, Shaanxi and  
240 Xinjiang.

## 241 **Statistical modelling**

242 Results of the dynamic panel model with supervised PCA involved two parts: one  
243 was the determination of principal components, and the other was the estimation and  
244 interpretation of associated factors' effects on human brucellosis.

### 245 **Determination of principal components**

246 Through calculation and comparison, 10 out of the 13 associated factors were  
247 selected as important associated factors, which were *GDP*, *animal\_husbandry*,  
248 *sheep\_num*, *mutton\_prod*, *good\_transfer*, *highway*, *institute\_num*, *health\_personnel*,  
249 *health\_input* and *rural\_medical\_prop*. The following principal components were then  
250 formed using these selected factors.

#### 251 (1) Principal components of the type I factors

252 The first two principal components were selected as representatives of the type I  
253 factors since their cumulative contribution rate was as high as 96.30%, and they were  
254 notated as  $economic_1$  and  $economic_2$  with the specific forms in Eq.(3) and (4).

$$255 \quad economic_1 = 0.474 \times GDP + 0.497 \times animal\_husbandry + 0.482 \times sheep\_num + 0.544 \times mutton\_prod, \quad (3)$$

$$256 \quad economic_2 = 0.528 \times GDP + 0.494 \times animal\_husbandry - 0.536 \times sheep\_num - 0.436 \times mutton\_prod, \quad (4)$$

257 Since all coefficients in Eq.(3) were positive,  $economic_1$  could be considered as the  
258 general representative of the type I factors. In  $economic_2$ , the coefficients of two  
259 factors ( $GDP$  and  $animal\_husbandry$ ) were positive while those of the other two  
260 factors ( $sheep\_num$  and  $mutton\_prod$ ) were negative. Therefore,  $economic_2$  implied  
261 that the effects of  $GDP$  and  $animal\_husbandry$  on human brucellosis might be  
262 different from those of the  $sheep\_num$  and  $mutton\_prod$ ; in other words,  $GDP$  and  
263  $animal\_husbandry$  were more likely to be risk factors of human brucellosis.

#### 264 (2) Principal components of the type II factors

265 Only the first principal component was selected to represent the type II factors, of  
266 which the cumulative contribution rate (84.96%) exceeded the threshold. This  
267 principal component was notated as  $transfer$  with the form of Eq.(5):

$$268 \quad transfer=0.707\times good\_transfer+0.707\times highway, \quad (5)$$

269 Coefficients in Eq.(5) were all positive, which indicated that  $good\_transfer$  and  
270  $highway$  might influence the human brucellosis incidence in a similar way.

#### 271 (3) Principal components of the type III factors

272 The first two principal components were selected as representatives of type III  
273 factors since their cumulative contribution rate was 94.11%. They were notated as  
274  $health_1$  and  $health_2$  with the form shown in Eq.(6) and (7).

$$275 \quad health_1=0.557\times institute\_num+0.542\times health\_personnel+0.577\times health\_input+0.251\times rural\_medical\_prop, \quad (6)$$

$$276 \quad health_2=0.188\times institute\_num+0.341\times health\_personnel-0.103\times health\_input-0.915\times rural\_medical\_prop, \quad (7)$$

277 Again, all coefficients in Eq.(6) were positive, which meant that  $health_1$  could be  
278 taken as the general representative of type III factors. In  $health_2$ , two coefficients  
279 ( $institute\_num$  and  $health\_personnel$ ) were positive and two ( $health\_input$  and  
280  $rural\_medical\_prop$ ) were negative, indicating that effects of  $institute\_num$  and  
281  $health\_personnel$  on human brucellosis might not be the same as those of  
282  $health\_input$  and  $rural\_medical\_prop$ , and that  $health\_input$  and  $rural\_medical\_prop$   
283 were prone to be protective factors of human brucellosis.

## 284 **Estimation and interpretation of the associated factors' effects**

### 285 (1) The estimation results

286 The dynamic panel data model was built by including aforementioned principal  
287 components and the incidence rate in the past year (reflecting the dynamic  
288 characteristics of the model) as associated factors in it. Table 2 and Fig 4 showed the  
289 estimated coefficients and the goodness-of-fit results, respectively.

290 **Table 2. The estimated coefficients of dynamic panel data model**

| Associated factor   | Coef   | SE   | $t$   | $P$    |
|---------------------|--------|------|-------|--------|
| $brucellosis_{t-1}$ | 0.95   | 0.04 | 22.31 | <0.001 |
| $economic_1$        | 0.65   | 0.35 | 1.88  | 0.06   |
| $economic_2$        | 0.40   | 0.42 | 0.96  | 0.34   |
| $health_1$          | - 1.14 | 0.47 | -2.42 | 0.02   |
| $health_2$          | 0.82   | 0.42 | 1.96  | 0.05   |
| $transfer$          | -0.87  | 0.47 | -1.86 | 0.07   |



291 According to Table 2,  $brucellosis_{t-1}$ ,  $health_1$  and  $health_2$  were associated with the  
292 current incidence of human brucellosis with statistical significance ( $P<0.05$ ). Among  
293 these three factors, the coefficients of  $brucellosis_{t-1}$  and  $health_2$  were positive, while  
294 the coefficient of  $health_1$  was negative. Such results indicated that: ①The human  
295 brucellosis incidence in the previous year was positively related to the epidemic in the  
296 current year in the same place, which reflected the historical baseline effect of  
297 infectious diseases. ②A negative association existed between the overall health  
298 factors and human brucellosis, which meant the improvement of hygienic and health  
299 situations would possibly reduce the transmission risk of infectious diseases including  
300 but not limited to human brucellosis. In terms of  $health_2$ , although the coefficient  
301 itself was positive, it should be reminded the coefficients of  $health\_input$  and  
302  $rural\_medical\_prop$  were negative according to Eq.(7). Hence,  $health_2$  emphasized  
303 that health input and rural medical expenditure proportion might play important roles  
304 in reducing the risk of human brucellosis.

305 In terms of the goodness-of-fit results, the corrected  $R^2$  of the model was 86.09%,  
306 which meant the model could explain more than 85% information of these factors'  
307 effects on human brucellosis incidence. In addition, Fig 4A presented the comparison  
308 of the actual incidence rates and the fitted ones by the model. It could be seen that  
309 both the actual and fitted values situated on the diagonal line, which demonstrated that  
310 the two values were approximately the same. Besides, Fig 4B verified that the  
311 residuals of the model were normally distributed around zero, indicating that the  
312 model has sufficiently extracted information from data. Therefore, it was reasonable

313 to conclude that the dynamic panel model with supervised PCA could appropriately  
314 clarify the effects of associated factors on human brucellosis.

315 **Fig 4. (A)The scatter plots of the observed incidence rates and the fitted values**  
316 **by model; (B)The histograms of the residuals of model.**

317 (2) The interpretation of results

318 The estimated results in Table 2 could be further explained by inserting Eq.(3)~(7)  
319 into Eq.(2), which could be rewritten as Eq.(8) in a clearer way.

$$320 \quad y_{n,t} = 0.95y_{n,t-1} + 0.51GDP + 0.52animal\_husbandry + 0.10sheep\_num + 0.18mutton\_prod \\ - 0.48institute\_num - 0.34health\_personnel - 0.74health\_input - 1.04rural\_medical\_prop \\ - 0.62good\_transfer - 0.62highway \quad (8)$$

321 Because all factors in Eq.(8) have been standardized beforehand, the coefficient of  
322 each factor in this equation can be interpreted as the average changing value of human  
323 brucellosis incidence rate as the associated factor changes per standard deviation unit  
324 while the other factors remain constant. From the perspective of epidemiology, the  
325 average changing value can also be seen as the attributive risk (AR). Therefore, it  
326 could be concluded that GDP, total output value of animal husbandry, amount of  
327 sheep and mutton production were potential risk factors of human brucellosis while  
328 the others were potential protective factors. It was also worth noting that the absolute  
329 values of the coefficients of rural medical expenditure proportion  
330 (*rural\_medical\_prop*) and public health expenditure (*health\_input*) were the largest  
331 two except  $y_{n,t-1}$ , suggesting that these two might be the key points in the control of

332 human brucellosis in China. More details of the effects on these associated factors  
333 would be discussed in the next section.

## 334 **Discussion**

335 Human brucellosis is one of the few infectious diseases whose incidence rates still  
336 keep increasing nowadays in mainland China [20]. Though previous studies have tried  
337 to explore its epidemic patterns and associated factors, this study contributed to the  
338 prevention of human brucellosis in a more novel and more explicit way: it not only  
339 considered both temporal and spatial patterns of human brucellosis across mainland  
340 China, but also comprehensively revealed the multiple relations between human  
341 brucellosis and its potential associated factors. Therefore, the results of this study  
342 could supply the following new knowledge and implications for the prevention and  
343 control work in this field.

344 Firstly, apart from the traditional recognition that human brucellosis incidence rates  
345 in northern China were much higher than those in southern area, this study further  
346 analysed and compared the temporal and spatial epidemic characteristics of various  
347 areas. Specifically, according to both the incidence level and epidemic trend, all  
348 provinces of mainland China were classified into three clusters, i.e., Cluster 1 with the  
349 highest incidence rate all year round, Cluster 2 with rather high incidence rates but  
350 lower than that of Cluster 1 and lastly, Cluster 3 whose incidence rates were at a  
351 comparatively low level.

352 Secondly, this study jointly considered some potential associated factors of human

353 brucellosis which used to be considered separately in previous studies. Results  
354 indicated that the human brucellosis incidence rate in the prior year may be a risk  
355 factor for the current year's possible epidemic (AR=0.95). More importantly, results  
356 also implied that public health expenditure and rural medical expenditure proportion  
357 might be two important protective factors of human brucellosis (AR =-0.74 and -1.04  
358 respectively).

359 Based on these new results, this study discovered that the practical work of human  
360 brucellosis prevention and control could be improved in at least two ways:

361 (1) Clustering could be used to better reveal the heterogeneity and complexity of  
362 the transmission dynamics of human brucellosis in different spatial and temporal  
363 settings. This study classified all provinces in mainland China into three clusters  
364 depending on the similar incidence level and epidemic trend within a cluster. Such  
365 partition could provide evidence for more effective countermeasures with greater  
366 pertinence targeting at various areas. Though some scholars [21] have previously tried  
367 to categorize areas in mainland China based on their incidence rates, this study put it  
368 further by considering both the incidence rate and the epidemic trend. By doing this,  
369 researchers could better reveal the association, know more about the epidemic  
370 mechanism as well as offer more practical clues for adjusting measures in different  
371 conditions.

372 (2) The exploratory analysis in this paper contributed to clarify the potential effects  
373 of associated factors on human brucellosis in a more comprehensive way. It helped

374 update and deepen the understanding of epidemic mechanism as well as locate the key  
375 areas of controlling human brucellosis more precisely. Here are some brief  
376 discussions on some factors involved.

377 ① **Historical impact** According to the analysis, there existed a statistically  
378 significant influence of the human brucellosis incidence rate in the previous year (lag,  
379 brucellosis 1) on the current incidence rate, which might be explained by the latency  
380 and invasiveness of brucella [22].

381 ② **Transportation impact** Many scholars have assumed that the smuggling of  
382 infected animal products from other provinces might account for the human  
383 brucellosis epidemics in those newly-emerging areas. However, the transportation  
384 impact turned out to be insignificantly negative in this study. One potential reason  
385 was that this study chose the turnover value of the whole society (*good\_transfer*) and  
386 total length of highway routes (*highway*) to represent transportation, but in real life,  
387 the smuggling of animal products (especially those infected ones) tended to depend  
388 more on hidden routes instead of highways. The other possible reason was that better  
389 transportation condition always associated with more advanced economic and social  
390 development, and in such case, the quarantine and inspection measures and  
391 regulations would be more sophisticated and stricter, which would reduce the  
392 smuggling of infected animal products.

393 ③ **Animal husbandry impact** Another widely-accepted opinion was that the  
394 development of husbandry and the change in feeding pattern might be the cause of

395 human brucellosis [19], but no supporting result was found in this study. This  
396 reminded us that though there was a possibility that the development of husbandry  
397 created a more suitable environment for the epidemic of human brucellosis, some  
398 other factors might minimize or even counteract such a risk. However, this result did  
399 not implicate to deny the influence of husbandry development on human brucellosis;  
400 on the contrary, it emphasized that the risk created by the development of husbandry  
401 could be reduced if much attention could be paid to some protective factors of human  
402 brucellosis.

403 **④Health impact** One interesting point of this study was that hygiene and health  
404 condition was negatively associated with human brucellosis epidemics. It suggested  
405 that efforts in improving the quality of community- or village- level public health  
406 services might bring unexpected benefits to the work of human brucellosis prevention  
407 and control. To be more specific, increasing the public health expenditure, especially  
408 the rural medical expenditure proportion might be a potential breakthrough for  
409 handling human brucellosis in the future.

410 The practical work of human brucellosis prevention and control involved allocating  
411 public resources in the most suitable and most cost-effective place especially when  
412 the budget is limited. To this end, combined with the results of this study, some  
413 following advices could be proposed: (I) Governments should further enhance the  
414 communication and corporation among hospitals, township health centres and rural  
415 clinics as well as increase the investment in economy and infrastructure in medical  
416 institutes [23-24]. Considering that the rural and traditional pastoral areas are still

417 high-risk regions, it is recommended to pay more attention to the improvement of the  
418 quality of village-level public health service in the countryside, which helps to better  
419 carry out tertiary prevention among residents living there. (II)Residents' initiatives in  
420 cooperating with the prevention work should be better encouraged, and this can be  
421 done by regular health education and propaganda. (III)The prevention work can also  
422 be improved by raising the health awareness of rural residents and perfecting the new  
423 rural cooperative medical system [25]. Governments can increase the subsidized  
424 expenditure of health care in rural areas so as to maximize the possibility of an  
425 increase of the rural medical expenditure proportion. Noticing that residents' incomes  
426 can also affect their medical expenditure [26], current priority could be given to  
427 increase the health care subsidy of residents in these areas in order to achieve the goal  
428 of improving the medical expenditure proportion to control human brucellosis.

429 Outside mainland China, many other regions in the world also suffer from human  
430 brucellosis, such as Southern Brazil and Portugal [27-28]. Although China is a  
431 country large in land and diverse in population composition, which could enhance the  
432 value of this study in providing evidence for better control measures in other areas, it  
433 is possible that different countries may have different reasons for human brucellosis  
434 epidemics. On this basis, further studies with cross-national data and more associated  
435 factors are expected to contribute to faster and better prevention and control of human  
436 brucellosis worldwide.

## 437 **Acknowledgements**

438 We gratefully thank Miss Minghan Xu for giving advice on the manuscript of this  
439 study.

## 440 **References**

- 441 [1] Torgerson PR, Devleeschauwer B, Praet N, Speybroeck N, Willingham AL, Kasuga F, et al.  
442 World Health Organization Estimates of the Global and Regional Disease Burden of 11  
443 Foodborne Parasitic Diseases, 2010: A Data Synthesis. *PLoS Med.* 2015 Dec 3;12(12):e1001920.  
444 doi: 10.1371/journal.pmed.1001920.
- 445 [2] Donev DM. Brucellosis as Priority Public Health Challenge in South Eastern European  
446 Countries. *Croat Med J.* 2010 Aug; 51(4): 283–284. doi: 10.3325/cmj.2010.51.283.
- 447 [3] Tamilly SL, Juliana CC, Tania PC, Amanda BN, Andressa S, Flávia KS, et al. Outbreak of  
448 human brucellosis in Southern Brazil and historical review of data from 2009 to 2018. *PLoS Negl*  
449 *Trop Dis.* 2018 Sep 18;12(9):e0006770. doi: 10.1371/journal.pntd.0006770.
- 450 [4] Chen Q, Lai S, Yin W, Zhou H, Li Y, Mu D, et al. Epidemic characteristics, high-risk  
451 townships and space-time clusters of human brucellosis in Shanxi Province of China, 2005-2014.  
452 *BMC Infect Dis.* 2016 Dec 19;16(1):760.
- 453 [5] Zhang X, Wang Z, Mu G, Wang T. Brucellosis control in northeast China: a long way to go.  
454 *Public Health.* 2015 Aug;129(8):1132-4. doi: 10.1016/j.puhe.2015.02.029.



- 455 [6] Lai S, Zhou H, Xiong W, Gilbert M, Huang Z, Yu J, et al. Changing Epidemiology of Human  
456 Brucellosis, China, 1955-2014. *Emerg Infect Dis.* 2017 Feb;23(2):184-194. doi:  
457 10.3201/eid2302.151710.
- 458 [7] Jia P, Joyner A. Human brucellosis occurrences in inner mongolia, China: a spatio-temporal  
459 distribution and ecological niche modeling approach. *BMC Infectious Diseases.* 2015 Feb 3;15:36.  
460 doi: 10.1186/s12879-015-0763-9.
- 461 [8] Ning P, Guo M, Guo K, Xu L, Ren M, Cheng Y, et al. Identification and effect decomposition  
462 of risk factors for *Brucella* contamination of raw whole milk in China. *PLoS One.* 2013 Jul  
463 10;8(7):e68230. doi: 10.1371/journal.pone.0068230.
- 464 [9] Pappas G, Papadimitriou P, Akritidis N, Christou L, Tsianos EV. The new global map of  
465 human brucellosis. *Lancet Infect Dis.* 2006 Feb;6(2):91-9.
- 466 [10] Liu Q, Xu W, Lu S, Jiang J, Zhou J, Shao Z, et al. Landscape of emerging and re-emerging  
467 infectious diseases in China: impact of ecology, climate, and behavior. *Front Med.* 2018  
468 Feb;12(1):3-22. doi: 10.1007/s11684-017-0605-9.
- 469 [11] Kong W. Brucellosis infection increasing in Southern China. *European Journal of Internal*  
470 *Medicine.* *Eur J Intern Med.* 2018 May;51:e16-e18. doi: 10.1016/j.ejim.2018.03.004.
- 471 [12] Jiang H, Fan M, Chen J, Mi J, Yu R, Zhao H, et al. MLVA genotyping of Chinese human  
472 *Brucella melitensis* biovar 1, 2 and 3 isolates. *BMC Microbiol.* 2011 Nov 22;11:256. doi:  
473 10.1186/1471-2180-11-256.

- 474 [13] Zhou L, Fan M, Hou Q, Jin Z, Sun X. Transmission dynamics and optimal control of  
475 brucellosis in Inner Mongolia of China. *Math Biosci Eng.* 2018 Apr 1;15(2):543-567. doi:  
476 10.3934/mbe.2018025.
- 477 [14] Mangalgi SS, Sajjan AG, Mohite ST, Gajul S. Brucellosis in Occupationally Exposed Groups.  
478 *J Clin Diagn Res.* 2016 Apr;10(4):DC24-7. doi: 10.7860/JCDR/2016/15276.7673.
- 479 [15] Guan P, Wu W, Huang D. Trends of reported human brucellosis cases in mainland China  
480 from 2007 to 2017: an exponential smoothing time series analysis. *Environ Health Prev Med.*  
481 2018 Jun 19;23(1):23. doi: 10.1186/s12199-018-0712-5.
- 482 [16] Li YJ, Li XL, Liang S, Fang LQ, Cao WC. Epidemiological features and risk factors  
483 associated with the spatial and temporal distribution of human brucellosis in China. *BMC Infect*  
484 *Dis.* 2013 Nov 16;13:547. doi: 10.1186/1471-2334-13-547.
- 485 [17] Hastie, T., Tibshirani, R., Friedman, J. *The elements of Statistical Learning: Data Mining,*  
486 *Inference, and Prediction.* 2nd ed. New York: Springer, 2009.
- 487 [18] Shi YJ, Lai SJ, Chen QL, Mu D, Li Y, Li XX, et al. Analysis on the epidemiological features  
488 of human brucellosis in northern and southern areas of China, 2015-2016. *Zhonghua Liu Xing*  
489 *Bing Xue Za Zhi.* 2017 Apr 10;38(4):435-440. doi: 10.3760/cma.j.issn.0254-6450.2017.04.005.  
490 Chinese.

- 491 [19] Zhang J, Yin F, Zhang T, Yang C, Zhang X, Feng Z, et al. Spatial analysis on human  
492 brucellosis incidence in mainland China: 2004-2010. *BMJ Open*. 2014 Apr 8;4(4):e004470. doi:  
493 10.1136/bmjopen-2013-004470.
- 494 [20] Zhang T, Yin F, Zhou T, Zhang XY, Li XS. Multivariate time series analysis on the dynamic  
495 relationship between Class B notifiable diseases and gross domestic product (GDP) in China. *Sci*  
496 *Rep*. 2016 Dec 23;6(1):29. doi: 10.1038/s41598-016-0020-5.
- 497 [21] Ministry of Agriculture and Rural Affairs of the People's Republic of China: **National**  
498 **Brucellosis Control Plan of China, 2016-2020**. Available from:  
499 [http://www.moa.gov.cn/govpublic/SYJ/201609/t20160909\\_5270524.htm](http://www.moa.gov.cn/govpublic/SYJ/201609/t20160909_5270524.htm)
- 500 [22] Hull NC, Schumaker BA. Comparisons of brucellosis between human and veterinary  
501 medicine. *Infect Ecol Epidemiol*. 2018 Jul 24;8(1):1500846. doi:  
502 10.1080/20008686.2018.1500846..
- 503 [23] Fouskis I, Sandalakis V, Christidou A, Tsatsaris A, Tzanakis N, Tselentis Y, et al. The  
504 epidemiology of Brucellosis in Greece, 2007-2012: a 'One Health' approach. *Trans R Soc Trop*  
505 *Med Hyg*. 2018 Mar 1;112(3):124-135. doi: 10.1093/trstmh/try031.
- 506 [24] Facciola A, Palamara MAR, D'Andrea G, Marano F, Magliarditi D, Puglisi G, et al.  
507 Brucellosis is a public health problem in southern Italy: Burden and epidemiological trend of  
508 human and animal disease. *J Infect Public Health*. 2018 Nov - Dec;11(6):861-866. doi:  
509 10.1016/j.jiph.2018.07.007.

- 510 [25] He X. The Impact of the Income Per Capita in Chinese Family on Medical Expenditure.  
511 Value Health. 2014 Nov;17(7):A790-791. doi: 10.1016/j.jval.2014.08.434..
- 512 [26] BH Baltagi, F Moscone. Health Care Expenditure and Income in the OECD Reconsidered:  
513 Evidence From Panel Data. Economic Modelling. 2010;27(4):804-811.
- 514 [27] Lemos TS, Cequinel JC, Costa TP, Navarro AB, Sprada A, Shibata FK, et al. Outbreak of  
515 human brucellosis in Southern Brazil and historical review of data from 2009 to 2018. PLoS Negl  
516 Trop Dis. 2018 Sep 18;12(9):e0006770. doi: 10.1371/journal.pntd.0006770.
- 517 [28] Pelerito A, Cordeiro R, Matos R, Santos MA, Soeiro S, Santos J, et al. Human brucellosis in  
518 Portugal-Retrospective analysis of suspected clinical cases of infection from 2009 to 2016. PLoS  
519 One. 2017 Jul 10;12(7):e0179667. doi: 10.1371/journal.pone.0179667.

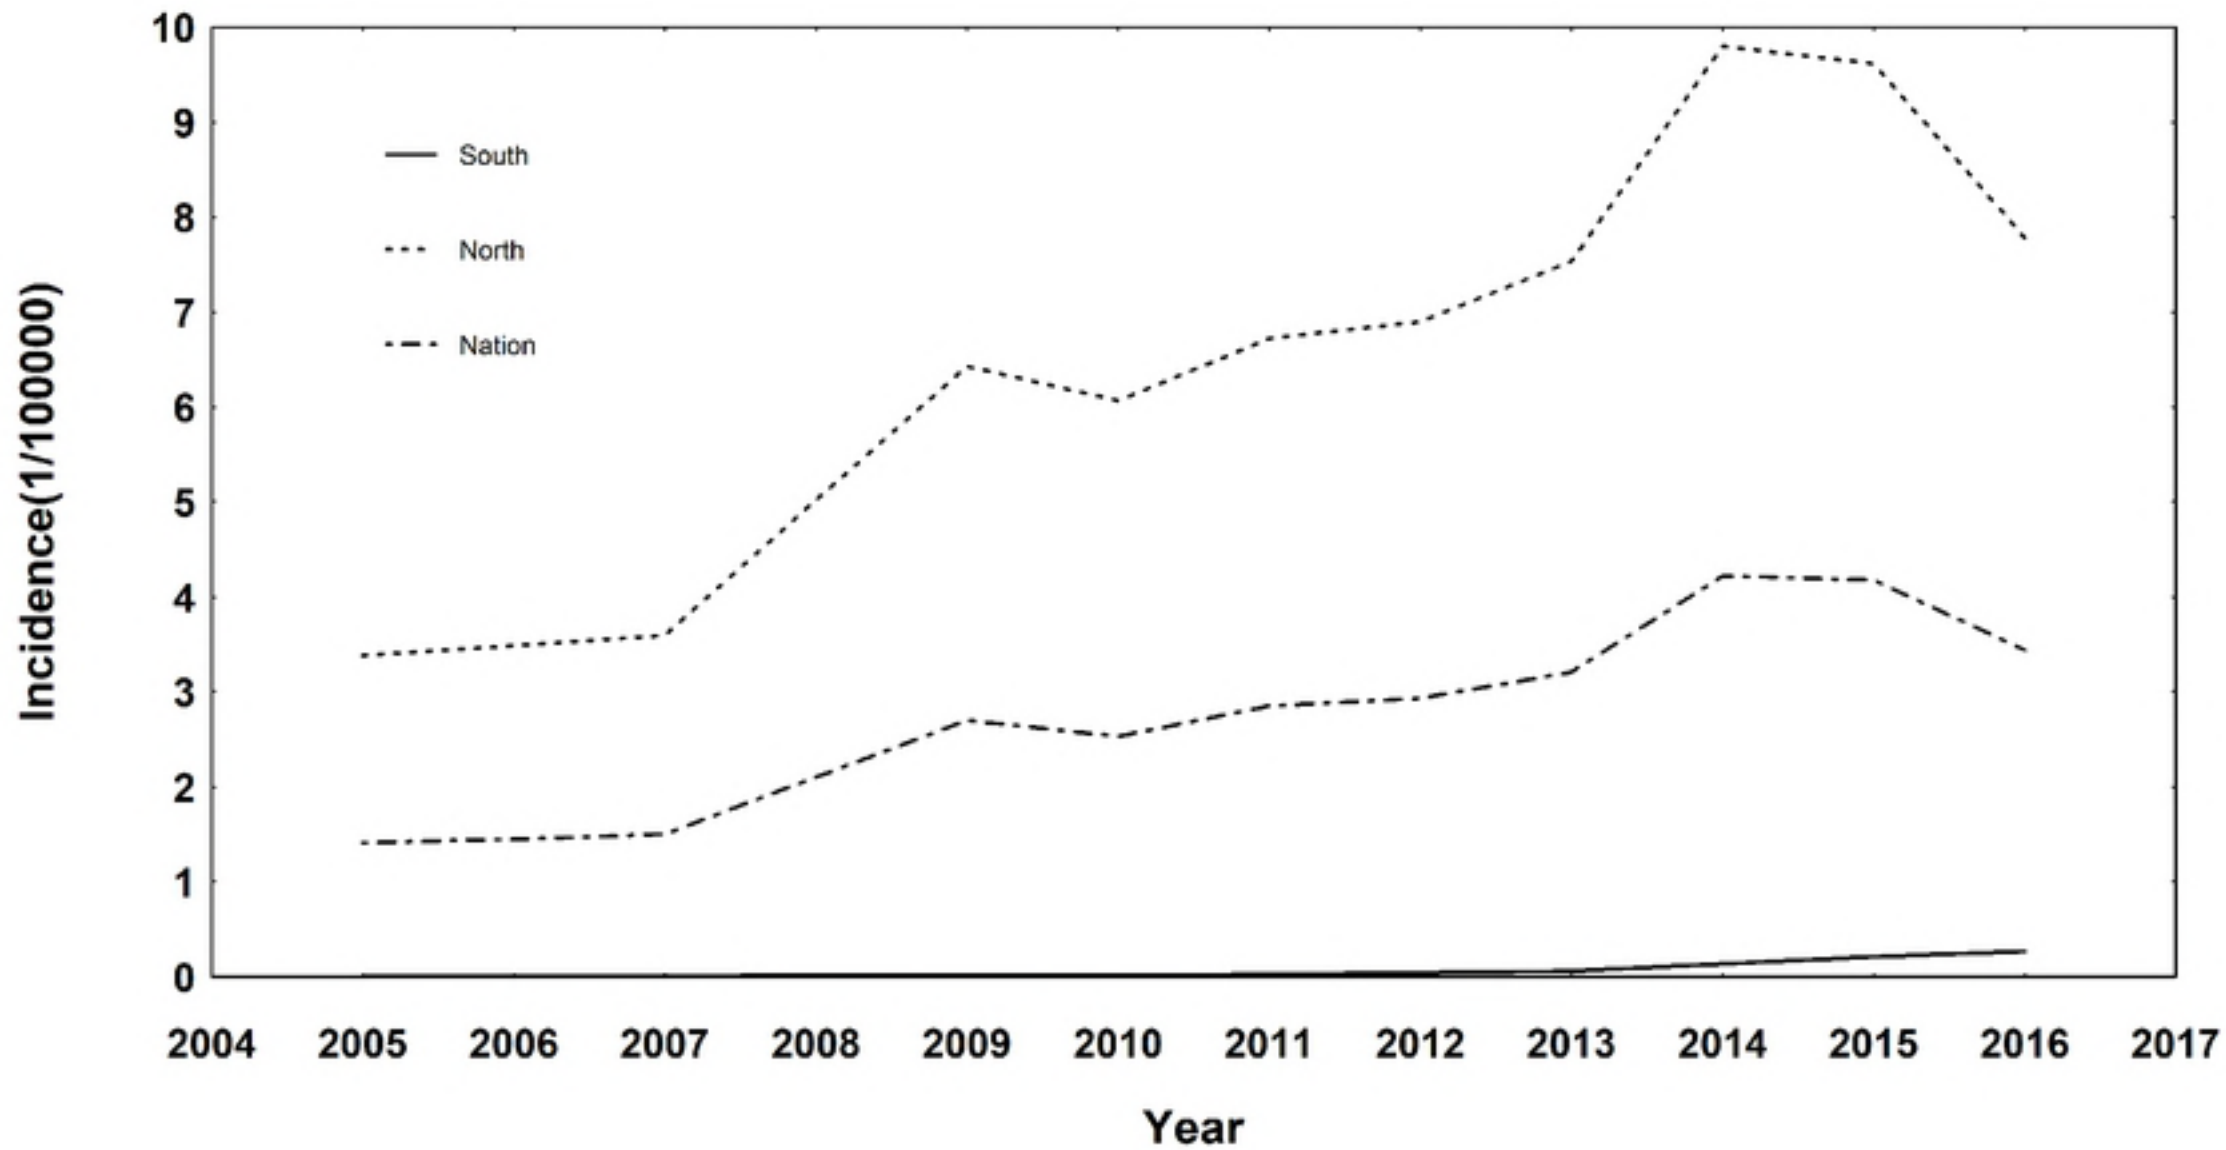

Figure 1

## Cluster Dendrogram

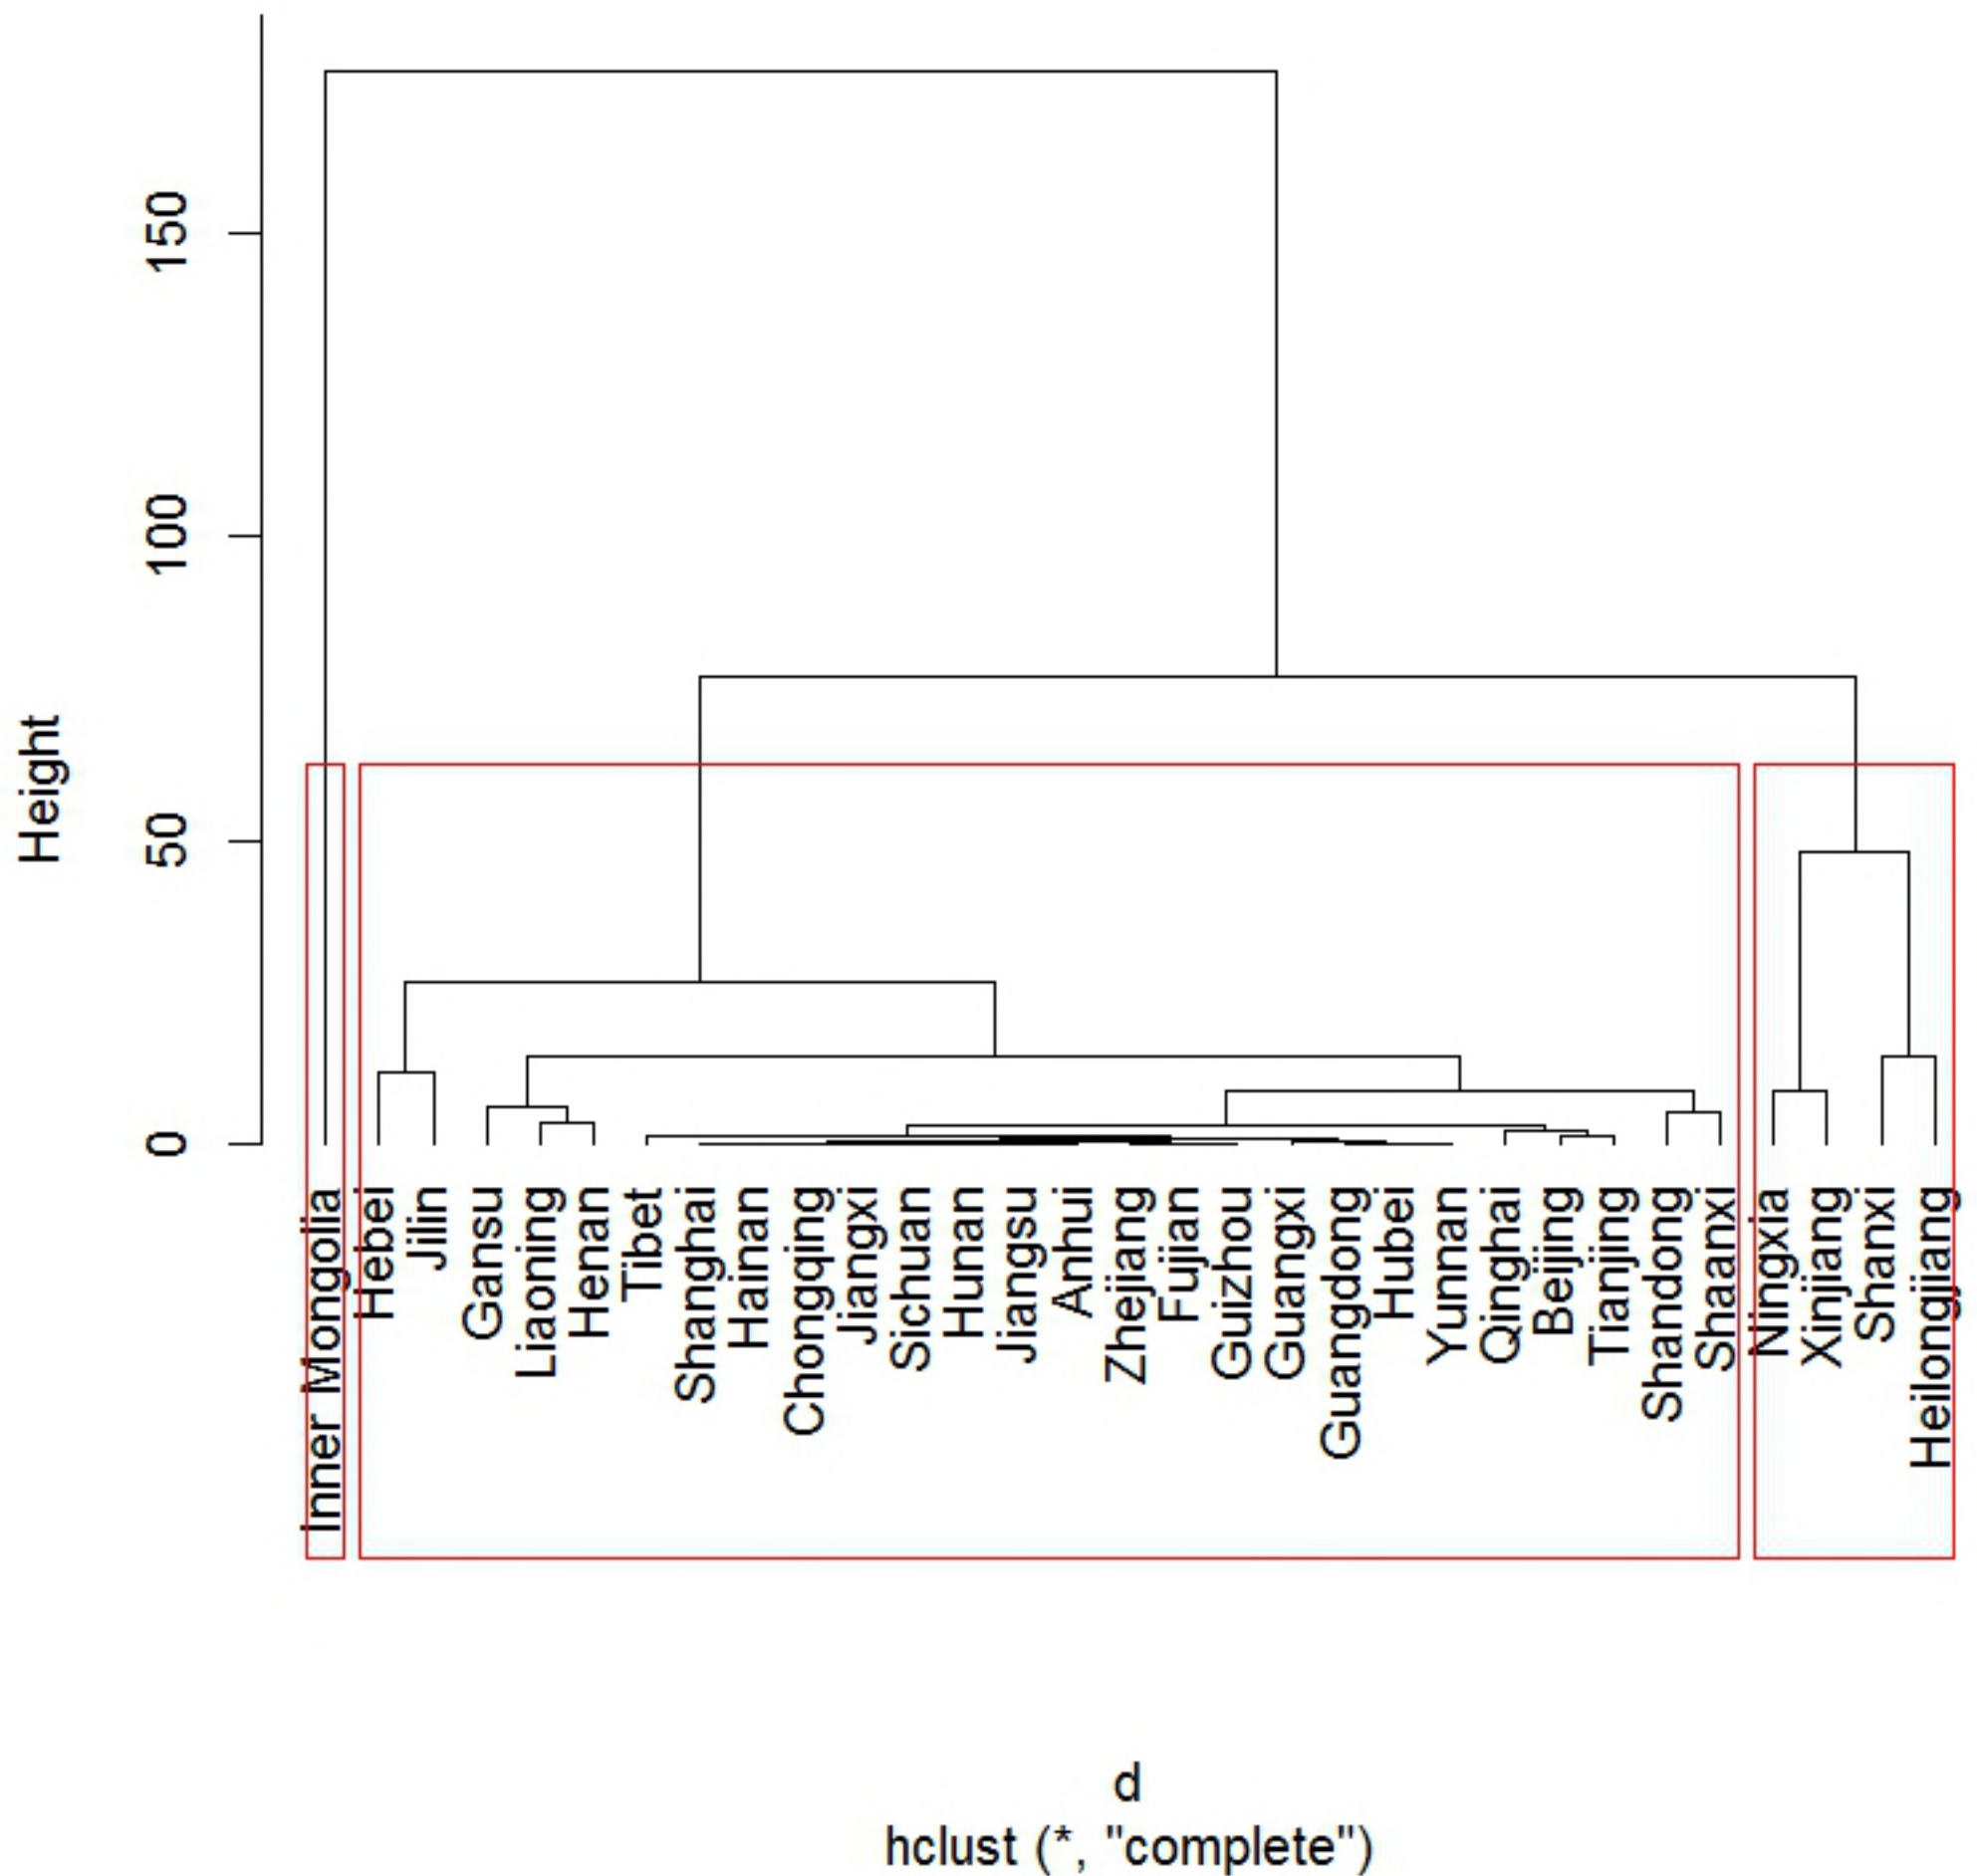

Figure 2

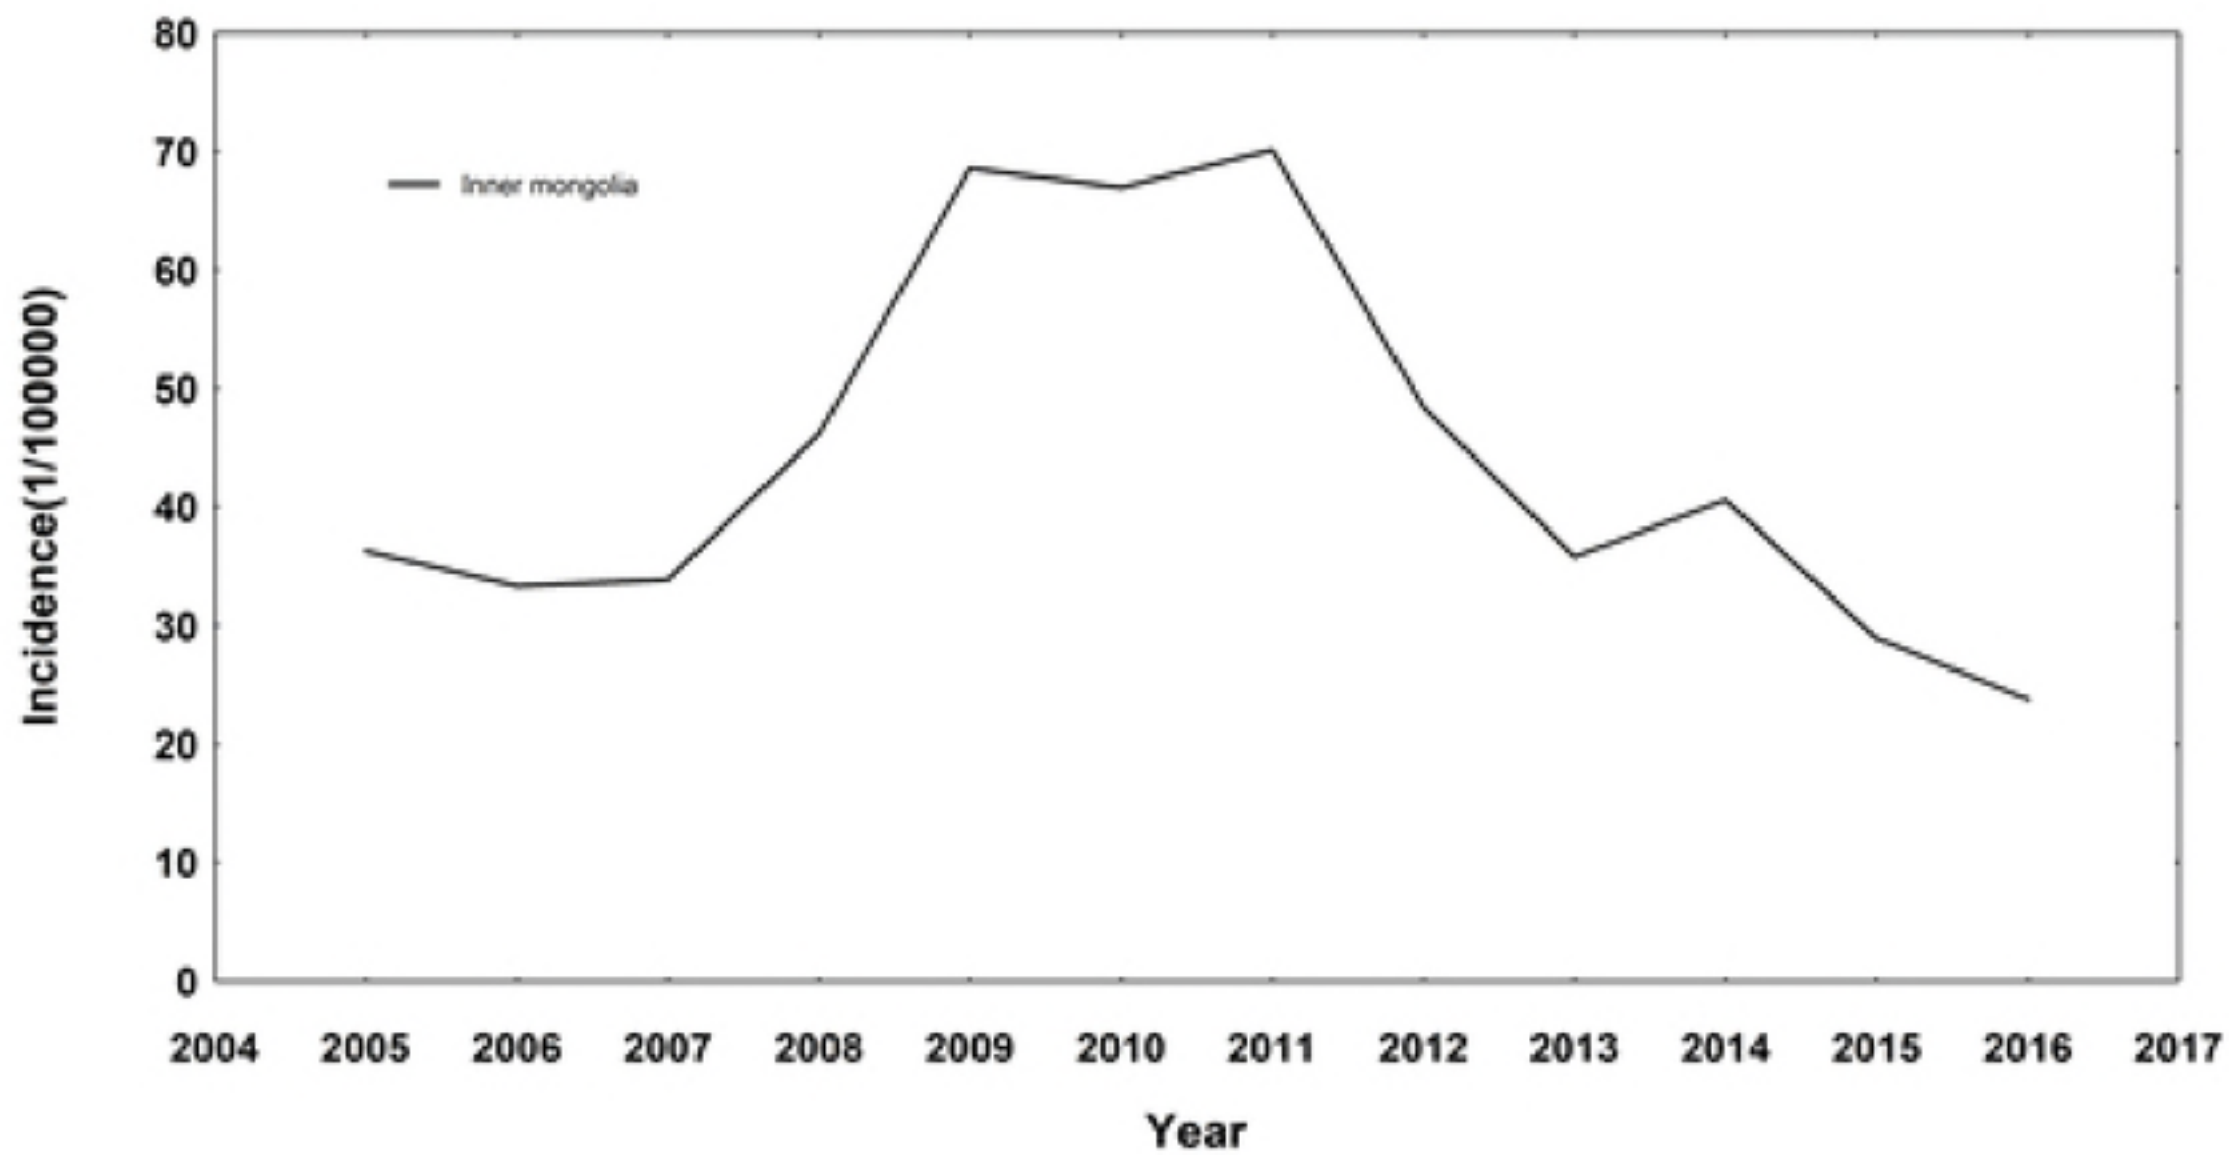

Figure 3A

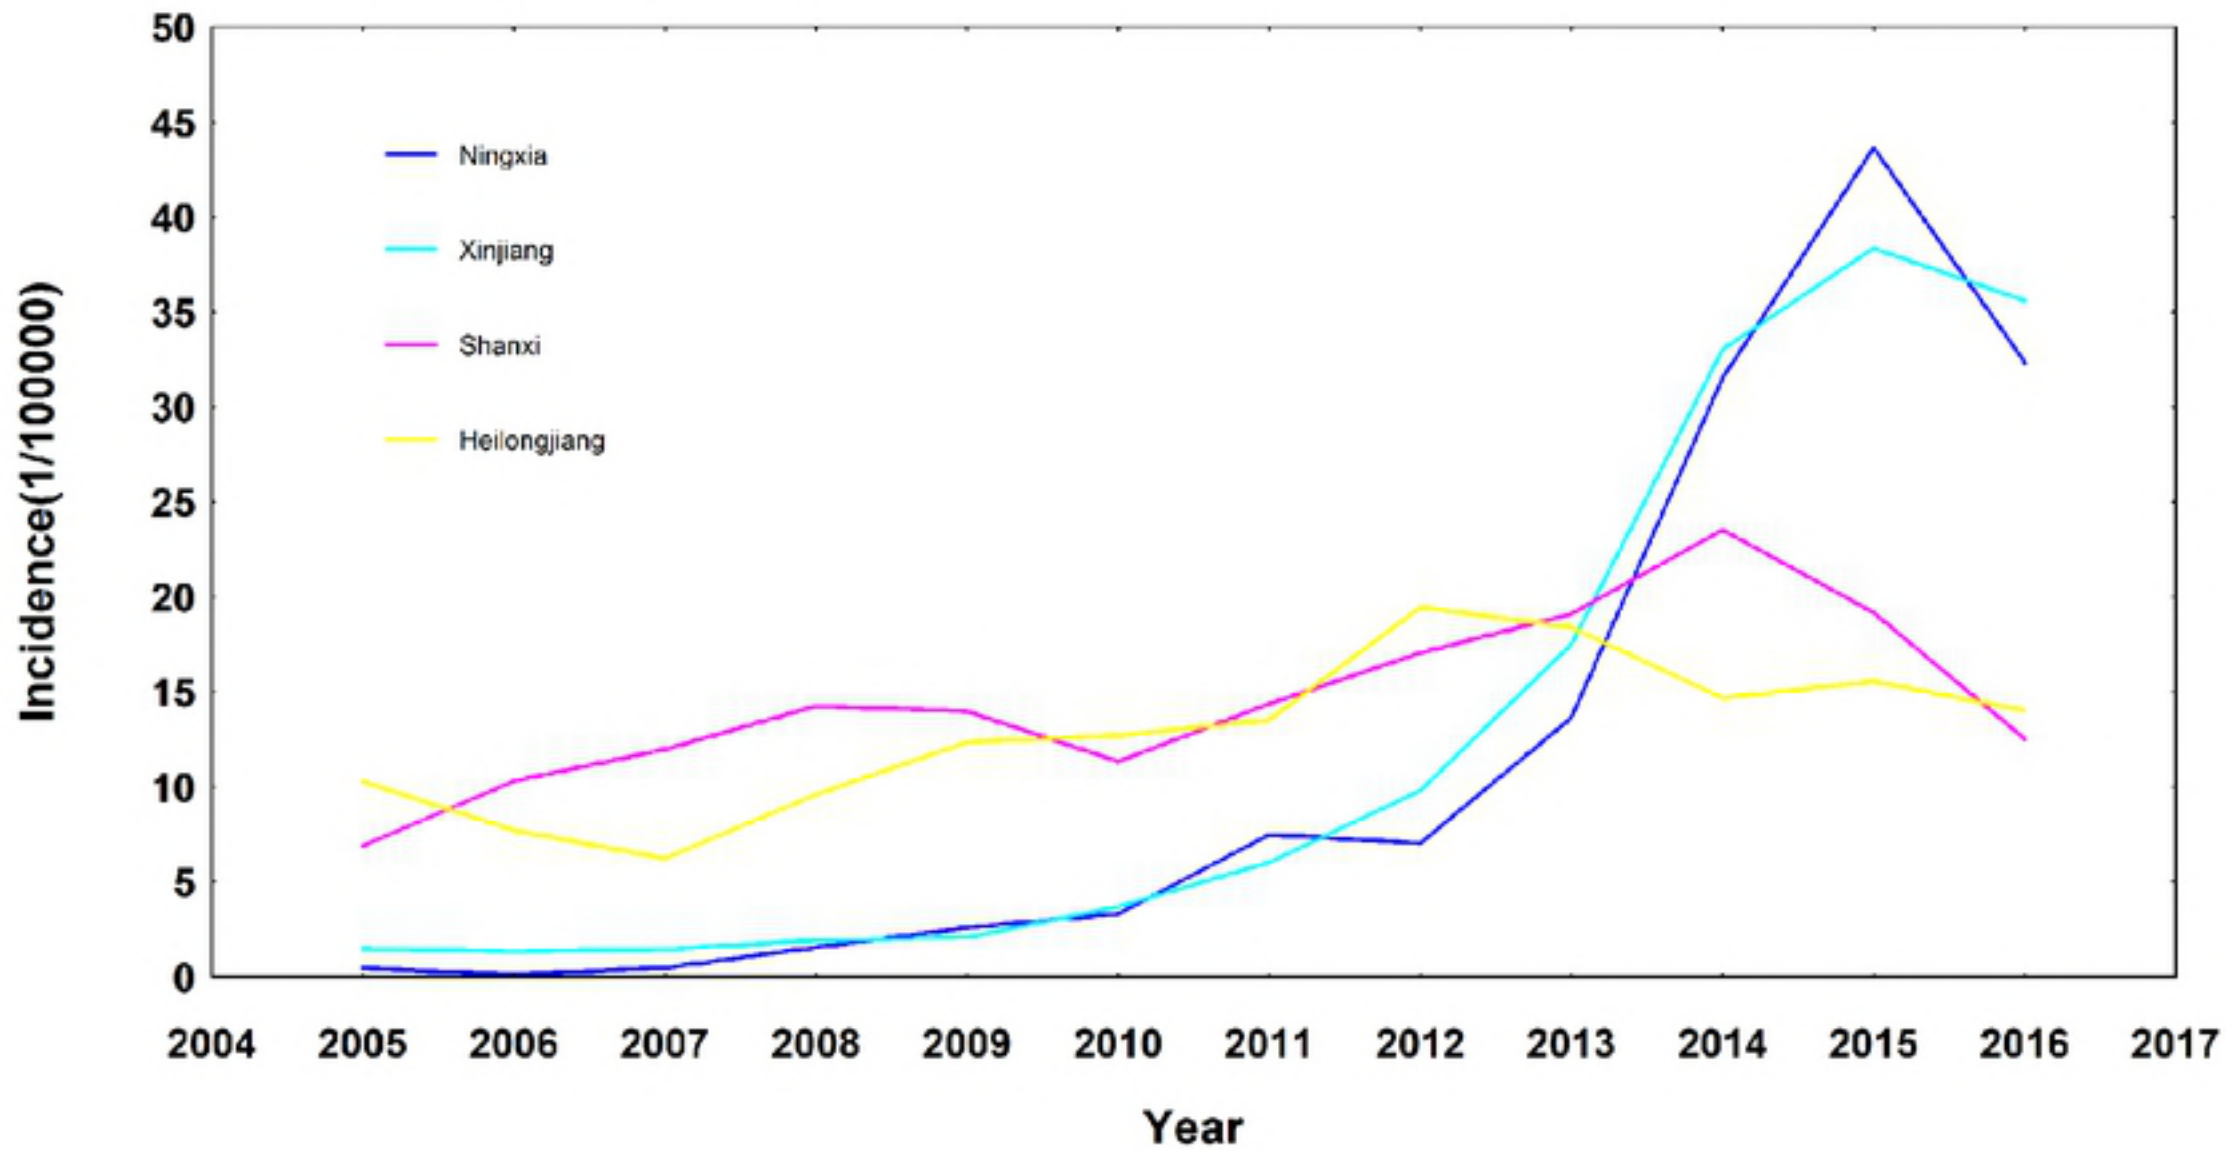

Figure 3B



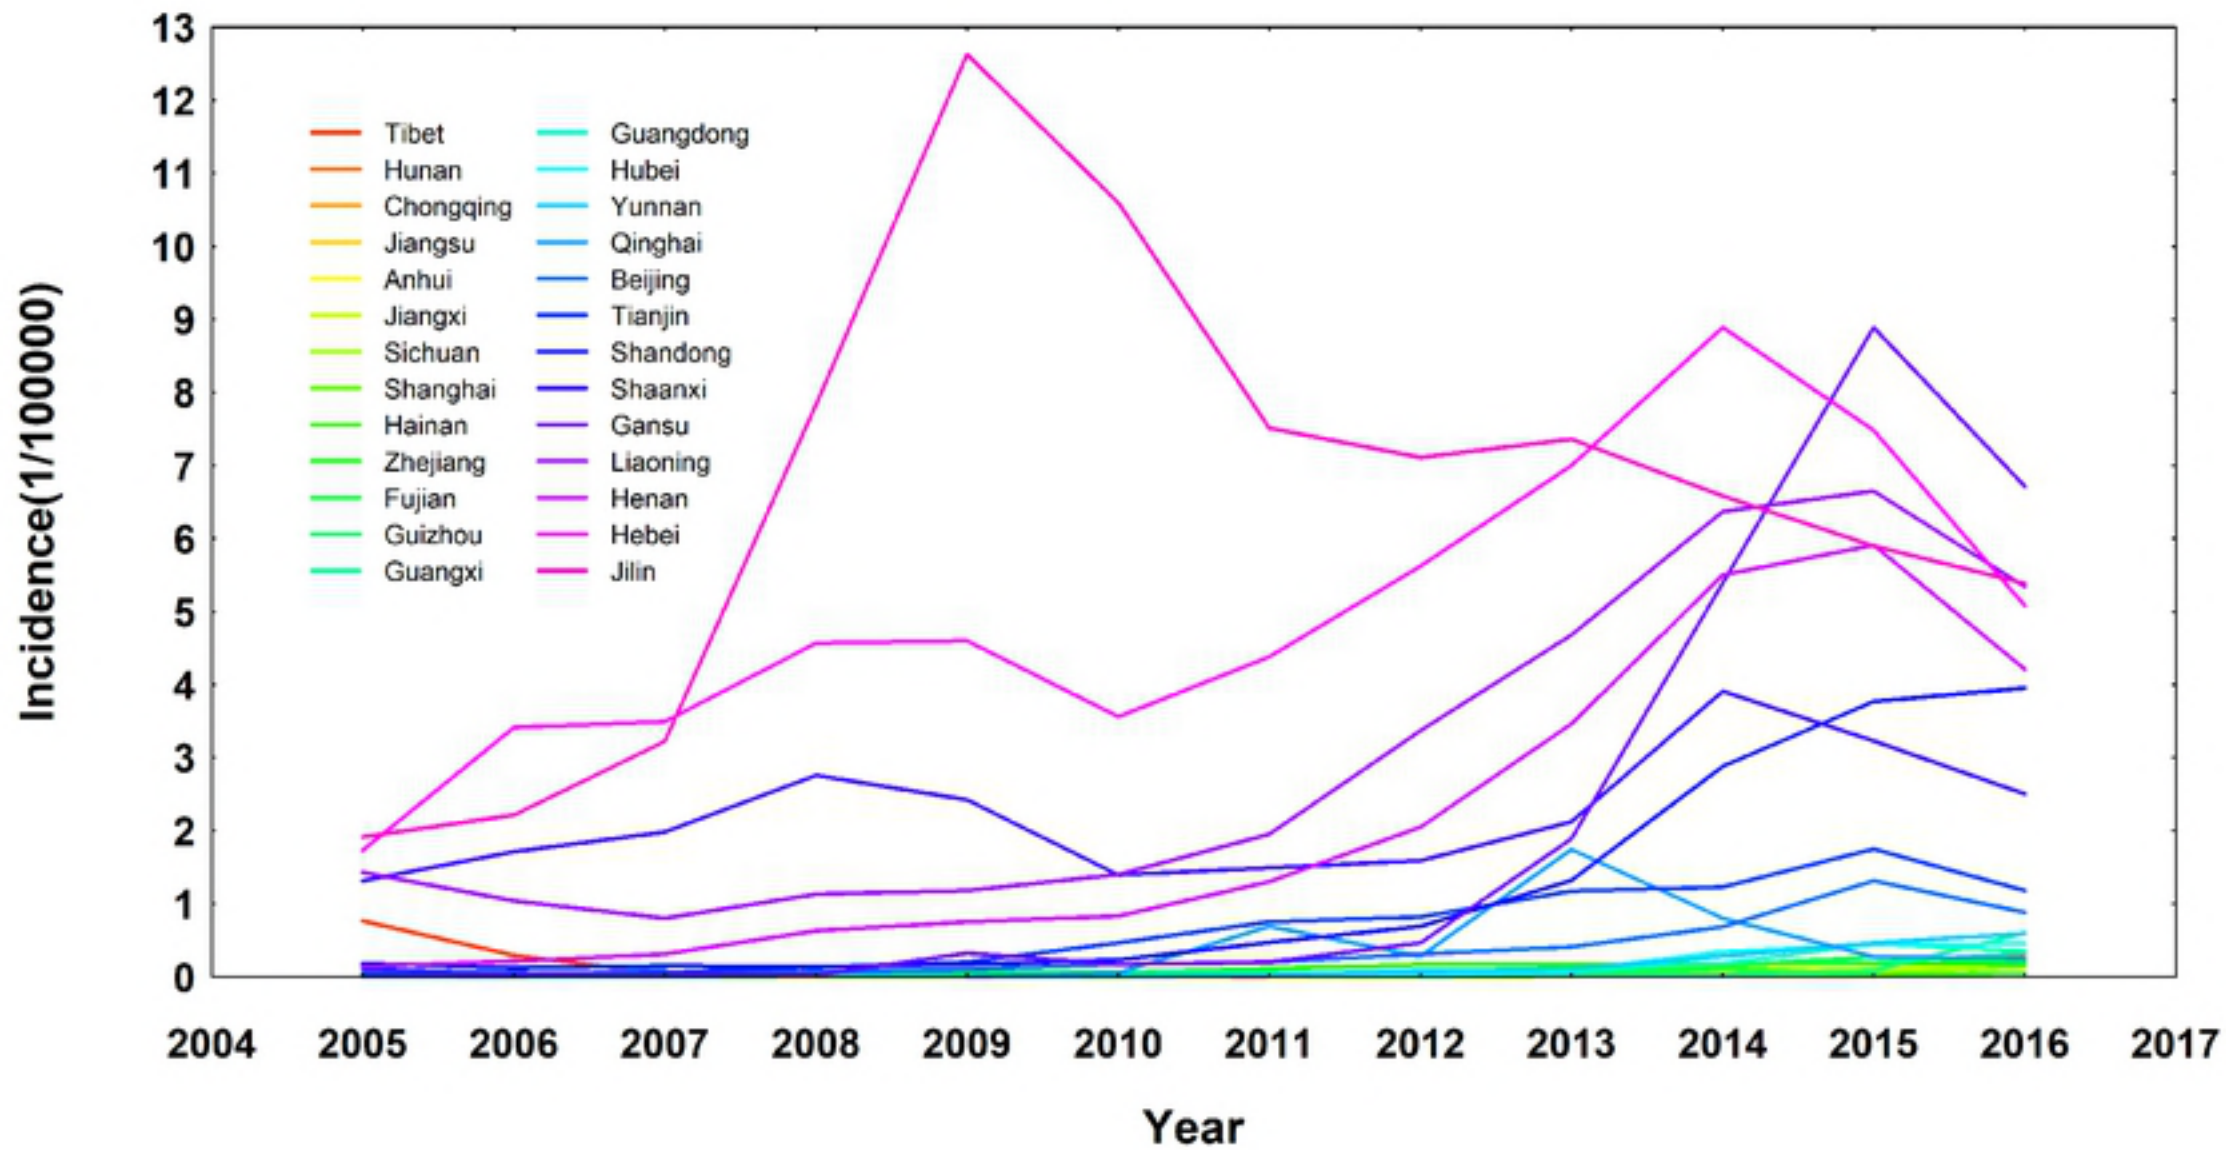

Figure 3C

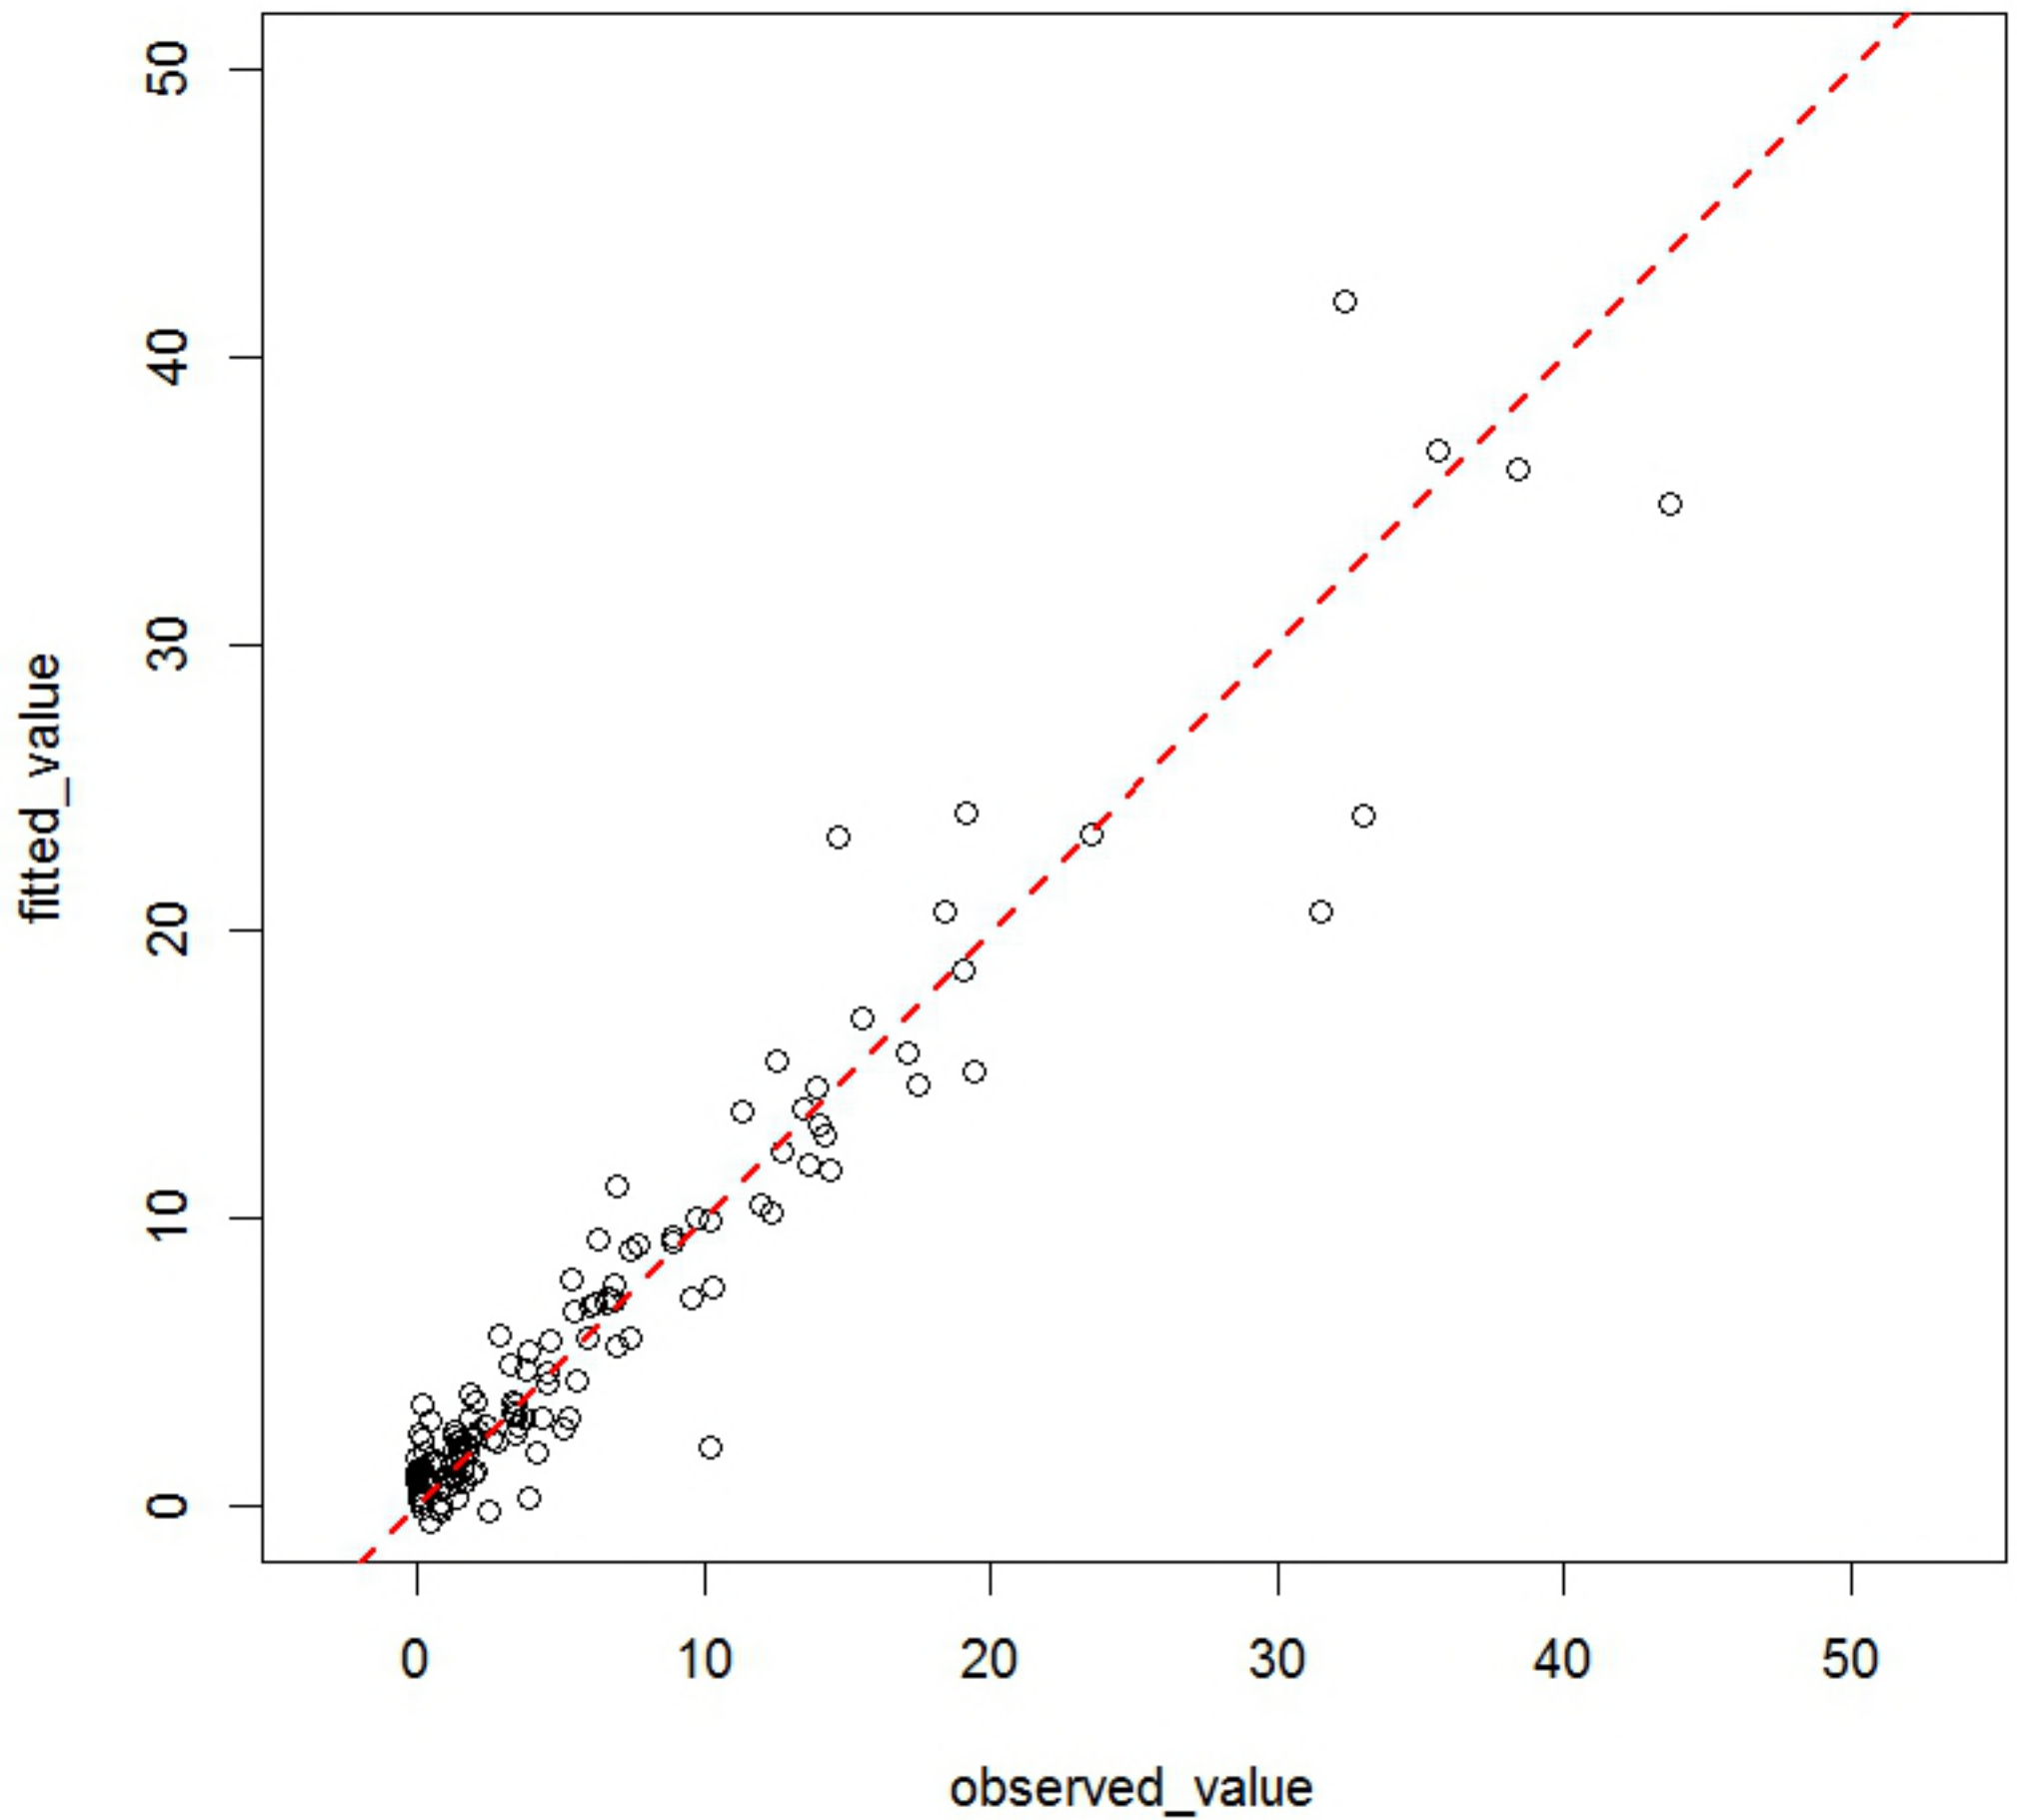

Figure 4A

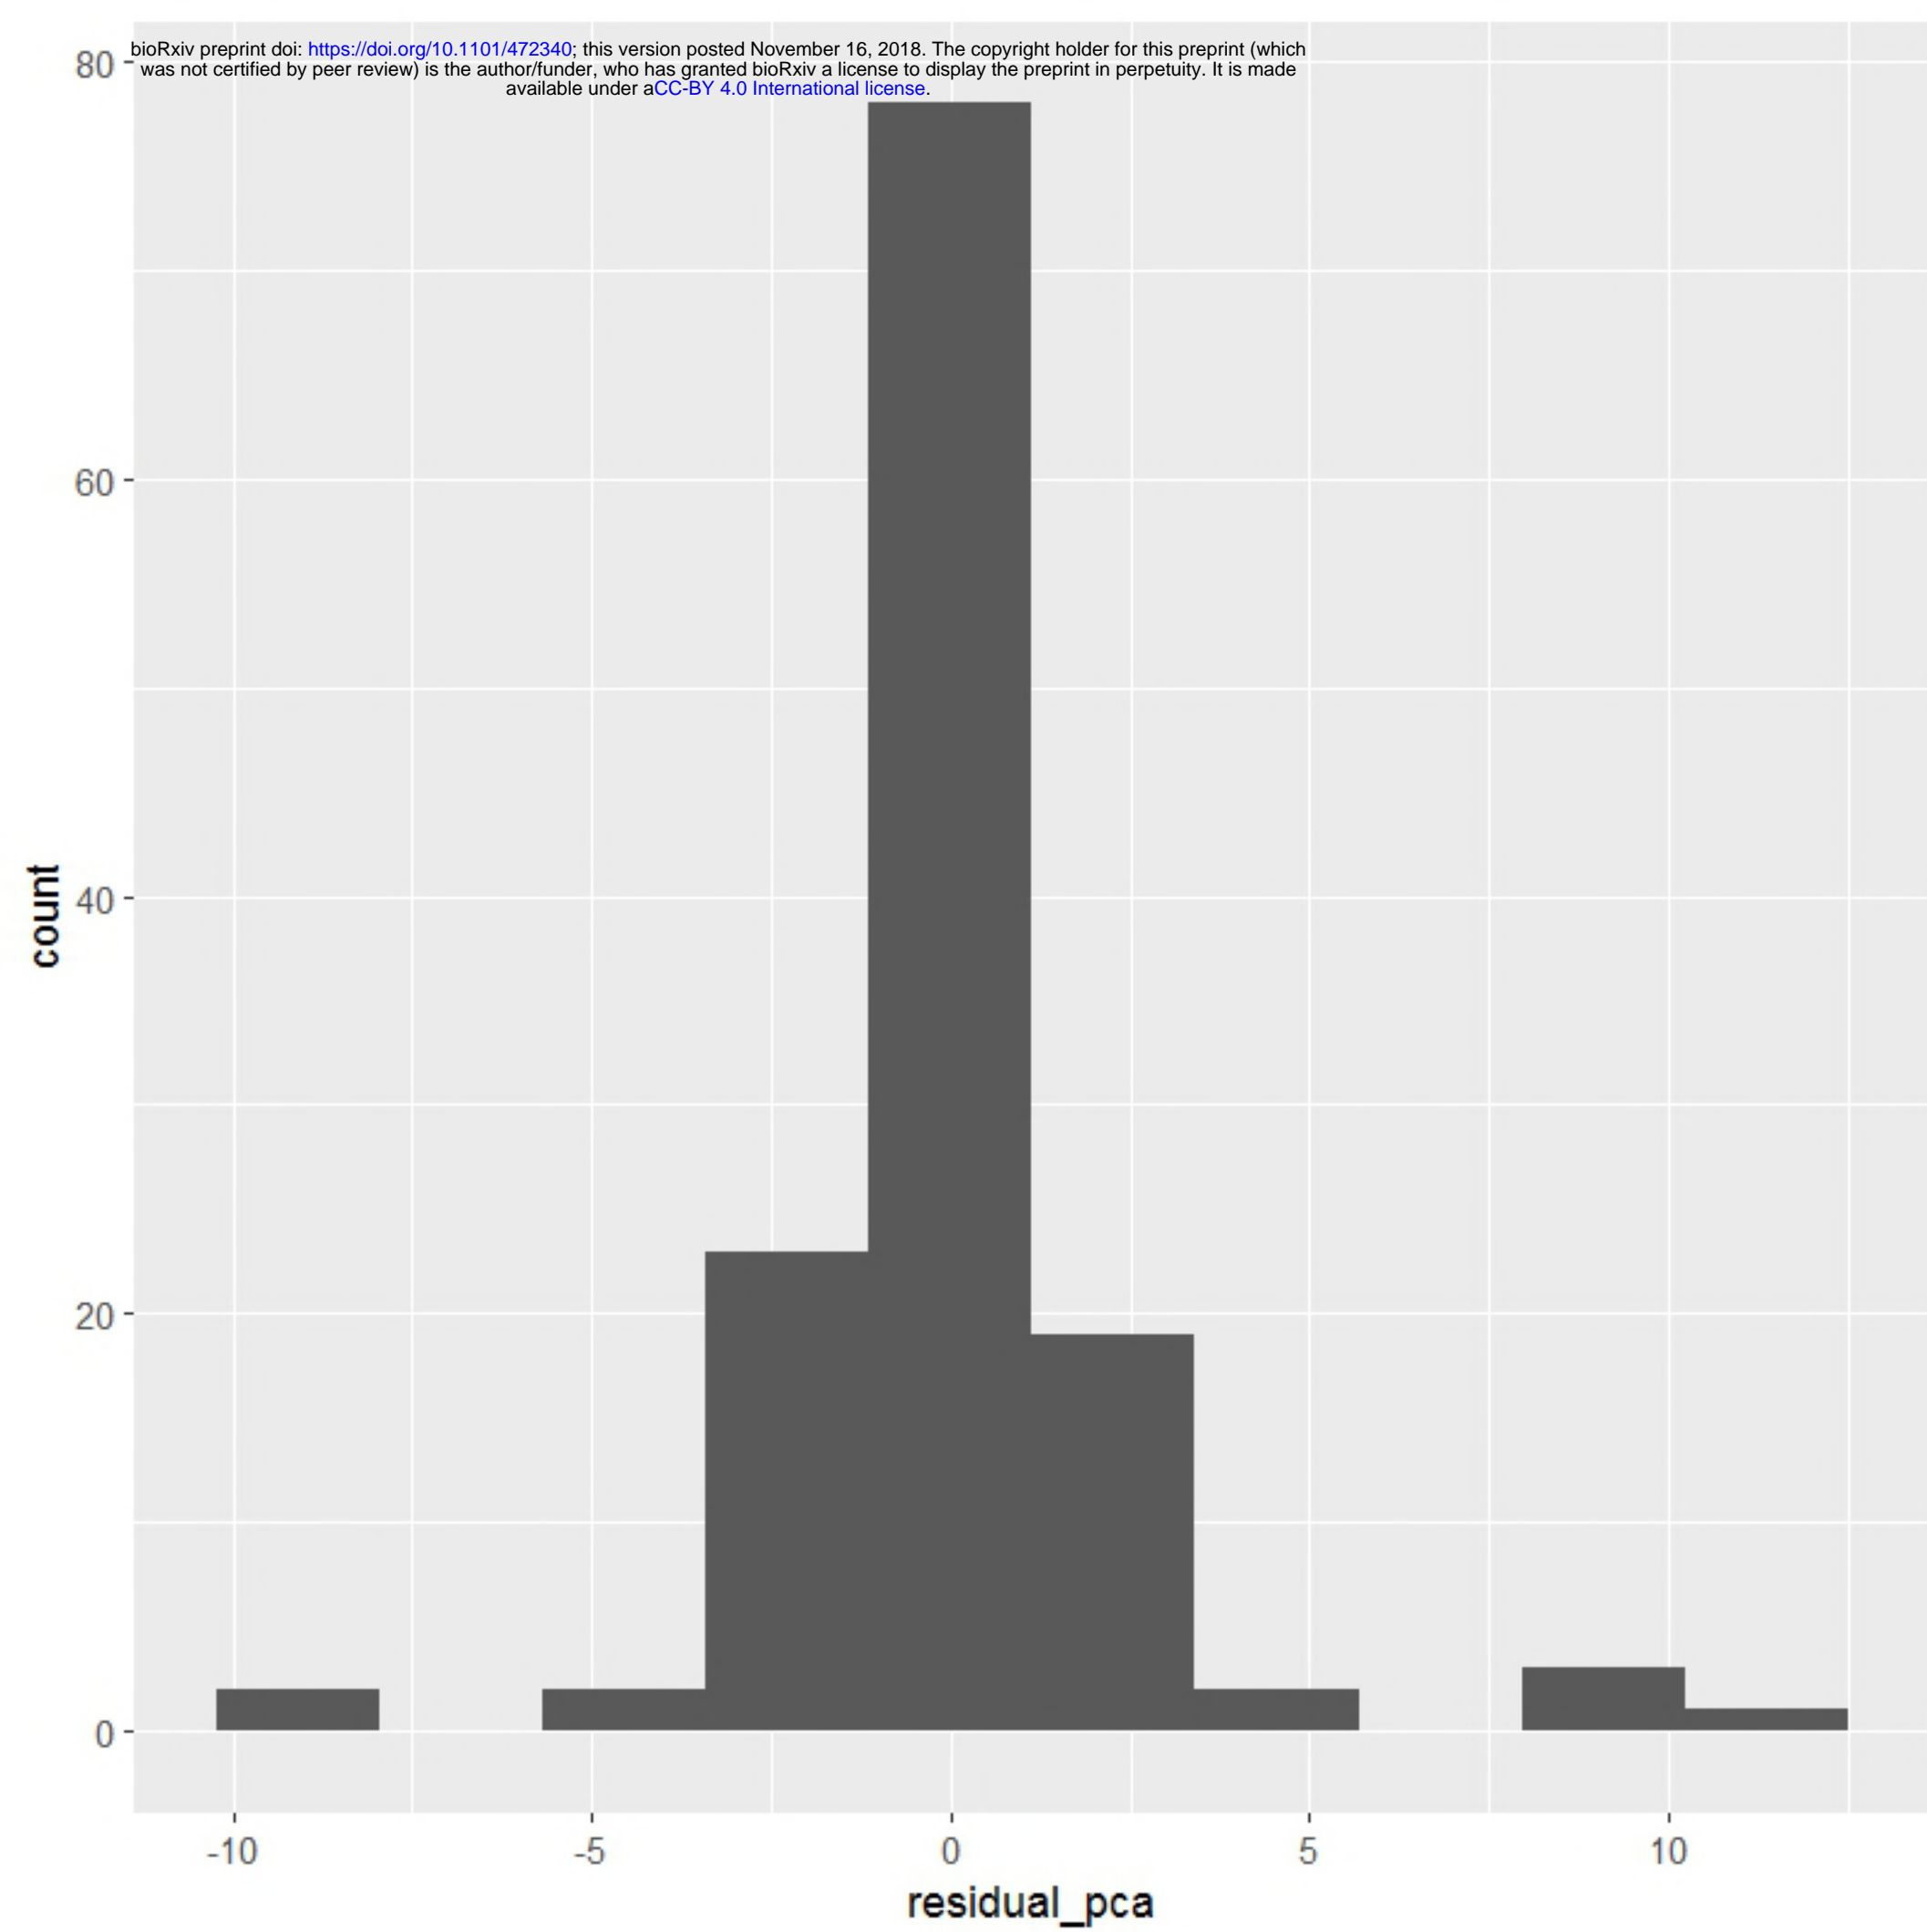

Figure 4B
